# Supplementary material for: 9-Amino-(9-deoxy)cinchona alkaloid-derived new chiral phase-transfer catalysts
Source: Royal Society of Chemistry journal article supplement (doi:10.1039/c4ob01648c), 2014-01-01

# 9-amino-(9-deoxy)cinchona alkaloids-derived novel chiral phase-transfer catalysts

Wenwen Peng,<sup>a</sup> Jun Cao,<sup>a</sup> Jingwei Wan,<sup>a</sup> Xuebing Ma<sup>\*a</sup> and Bing Xie,<sup>\*b</sup>

College of Chemistry and Chemical Engineering, Southwest University,  
Chongqing, 400715, P. R. China

## 1. NMR spectra

### 1.1 <sup>1</sup>H and <sup>13</sup>C NMR spectra of **2a-d**

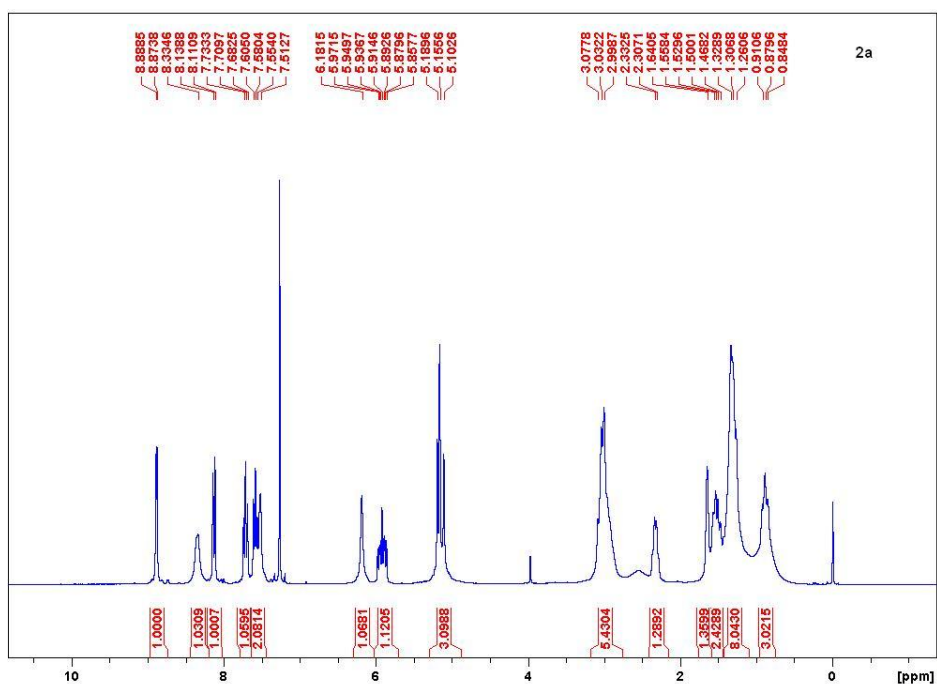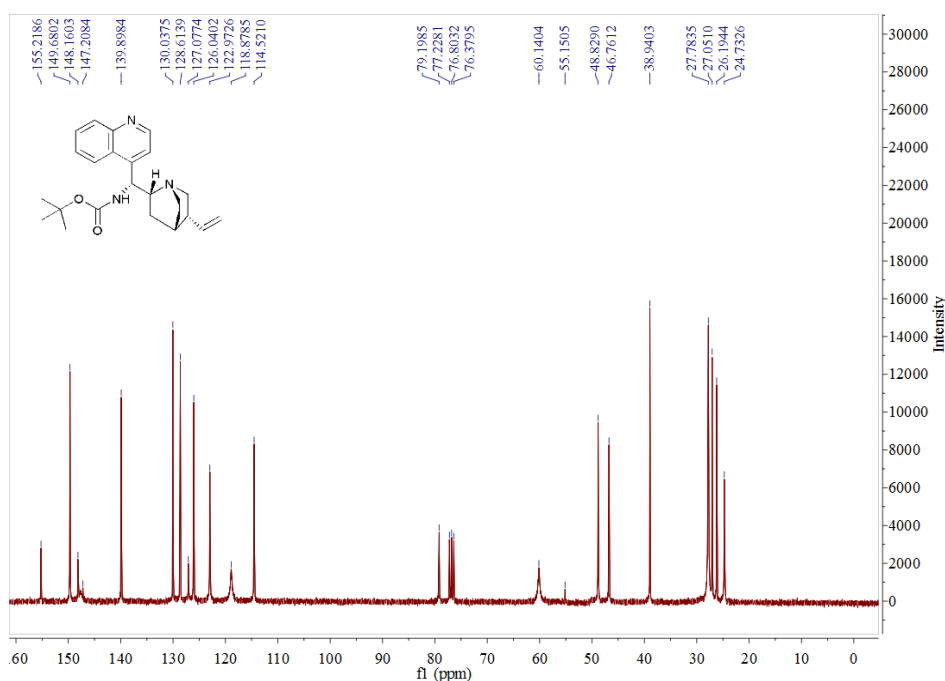

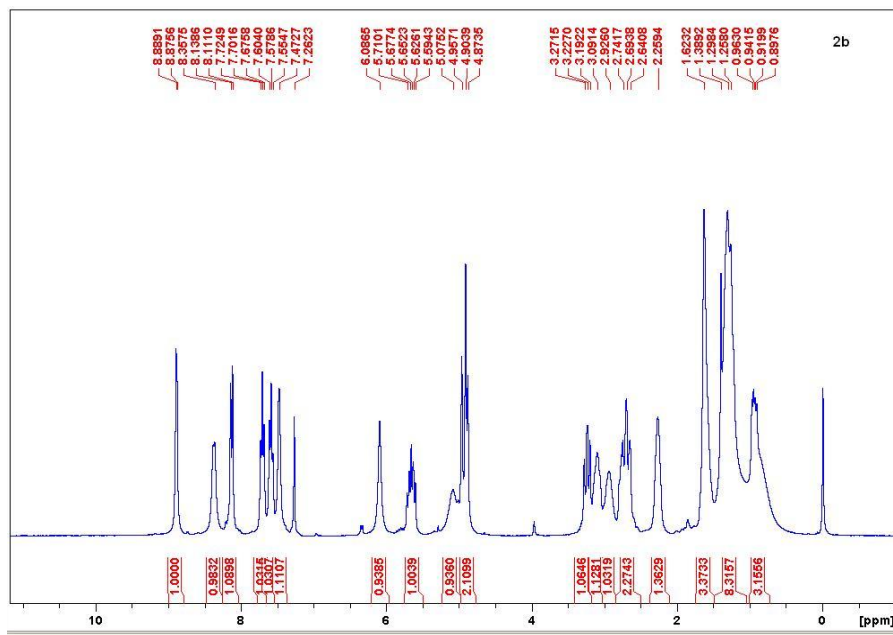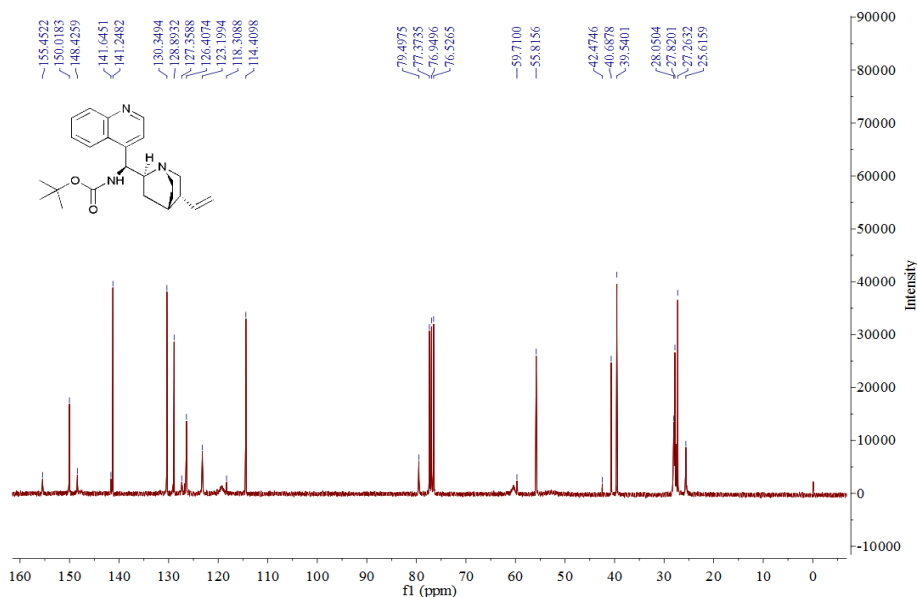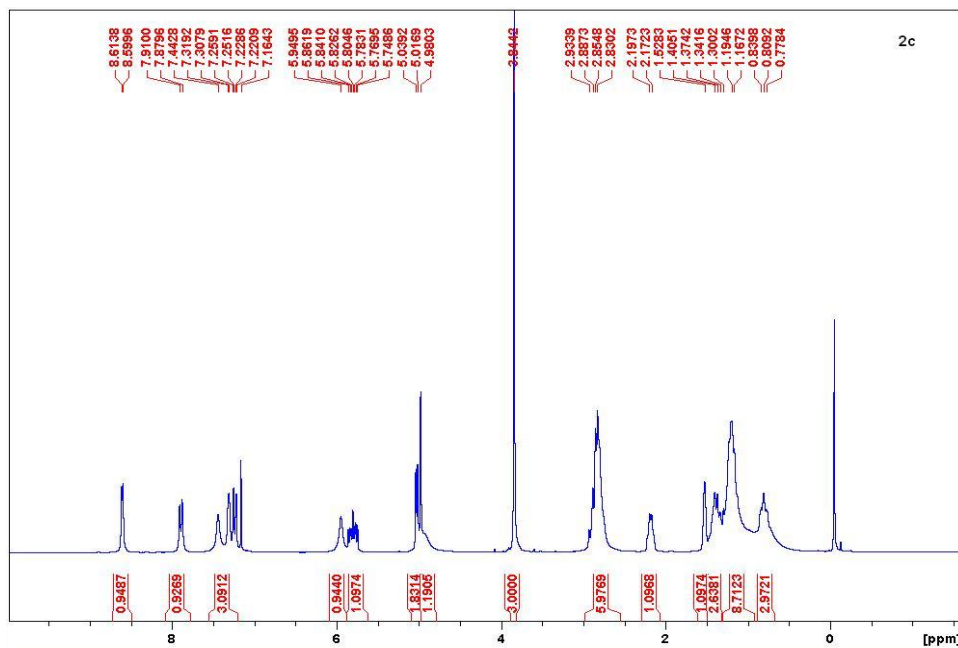

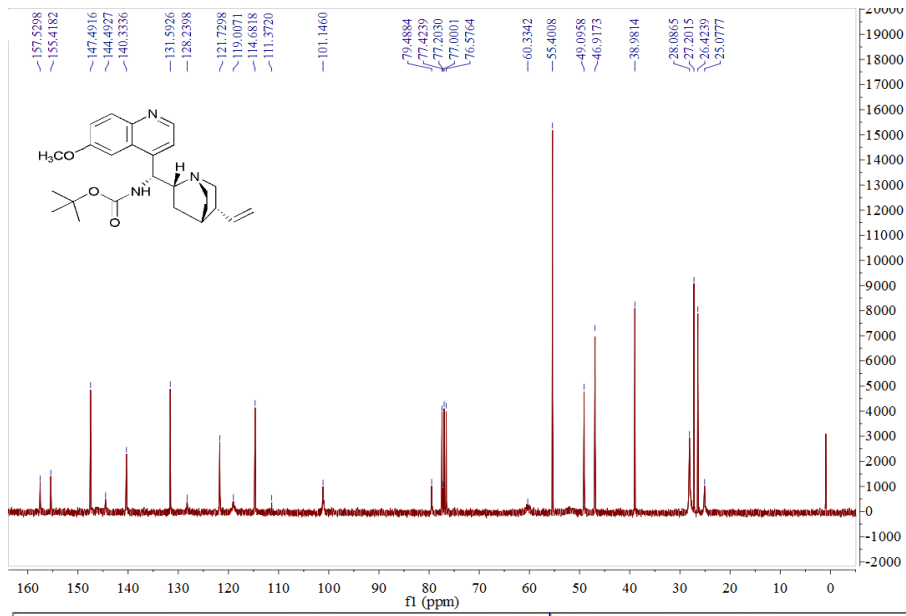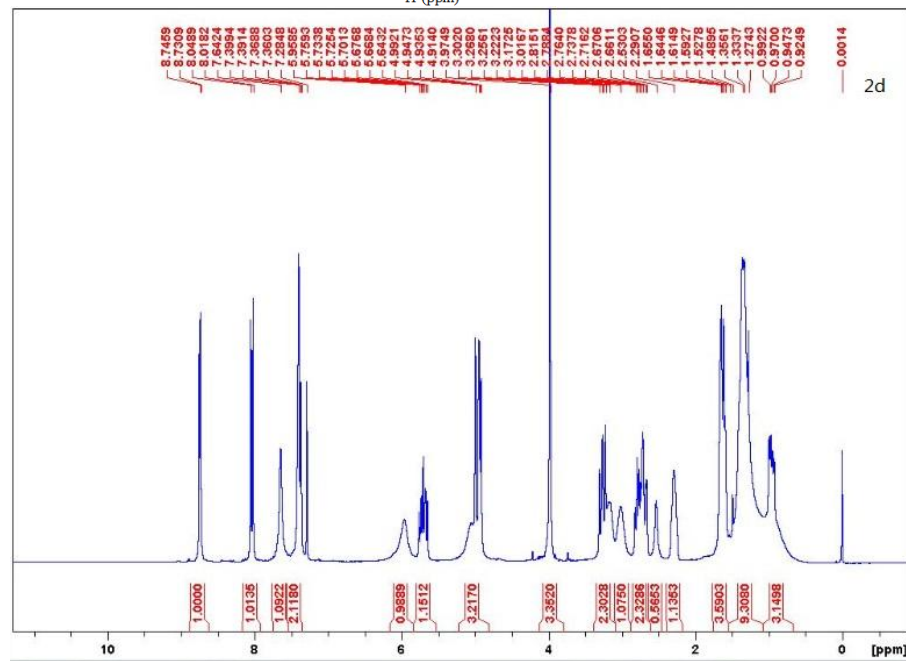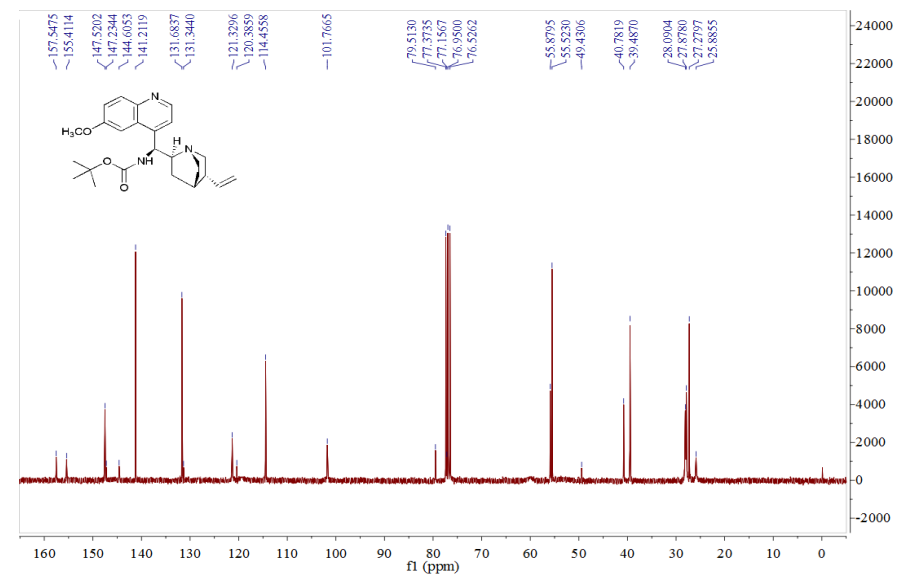

1.2  $^1\text{H}$  and  $^{13}\text{C}$  NMR spectra of **3a<sub>1</sub>-d<sub>1</sub>** and **3a<sub>2</sub>-d<sub>2</sub>**

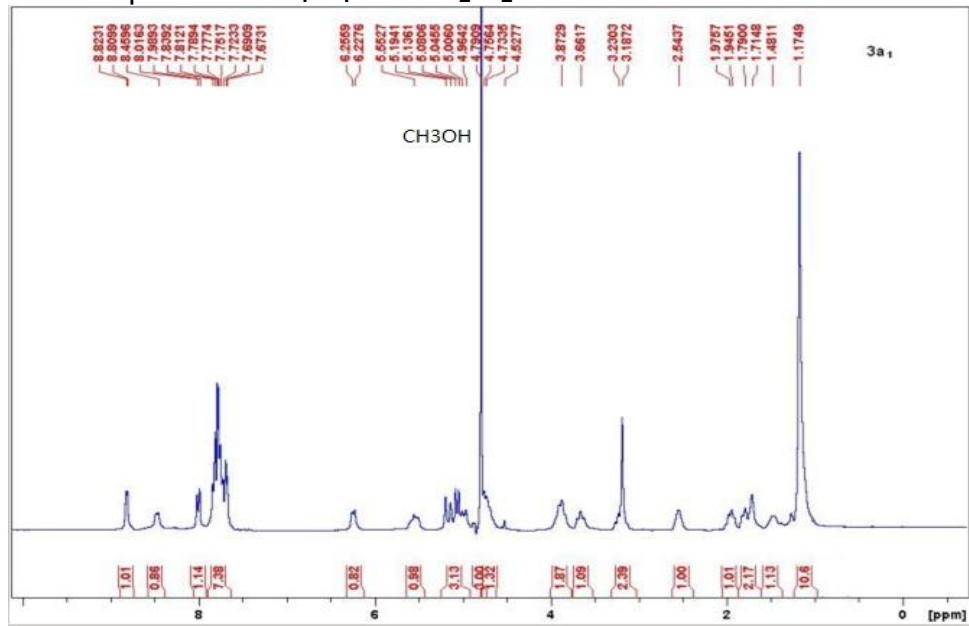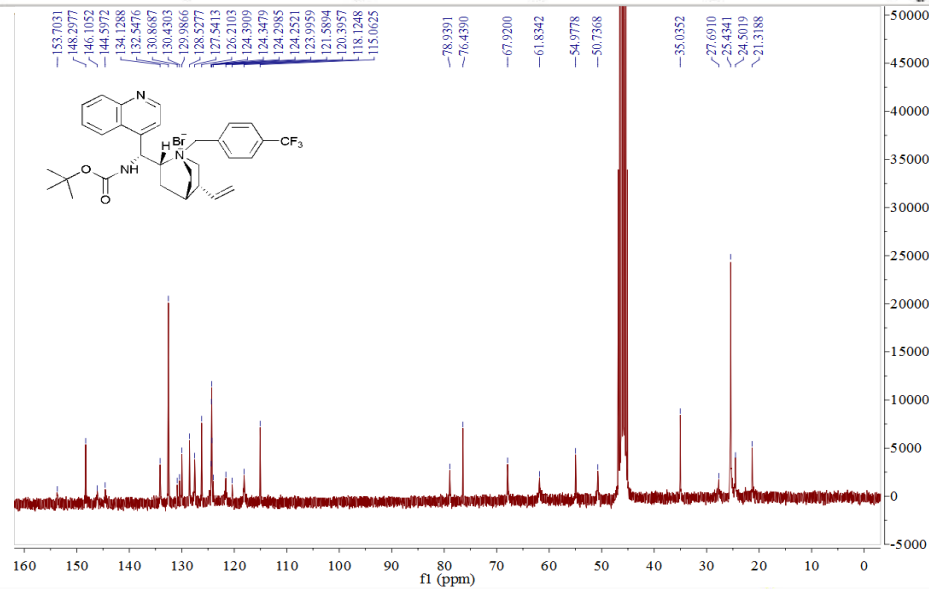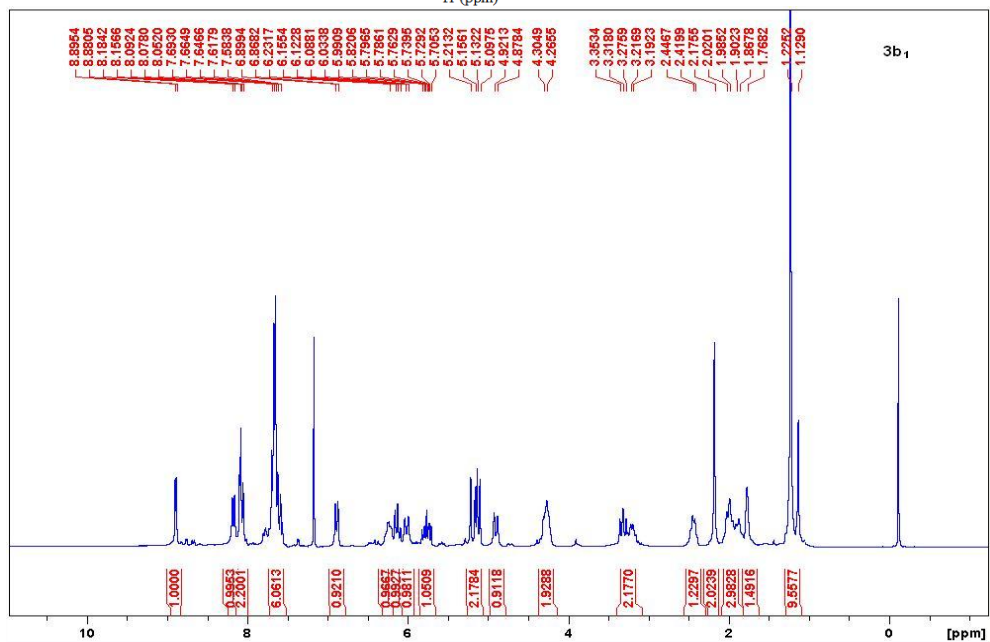

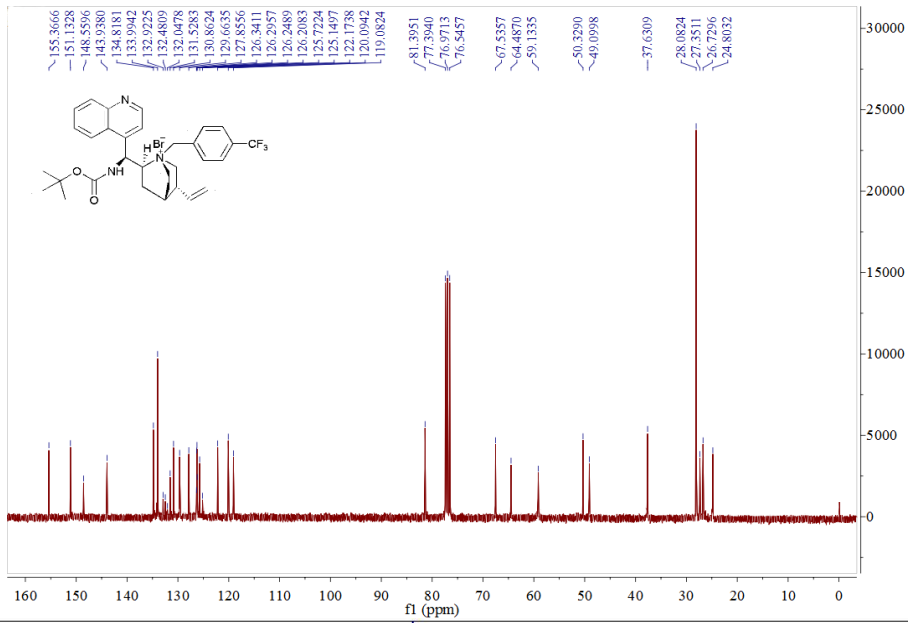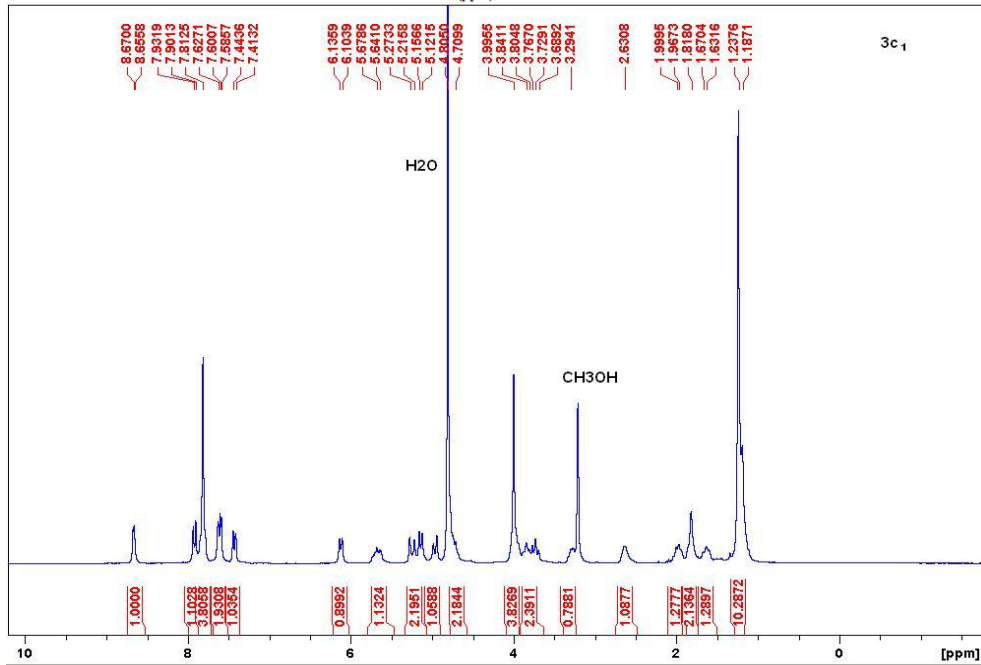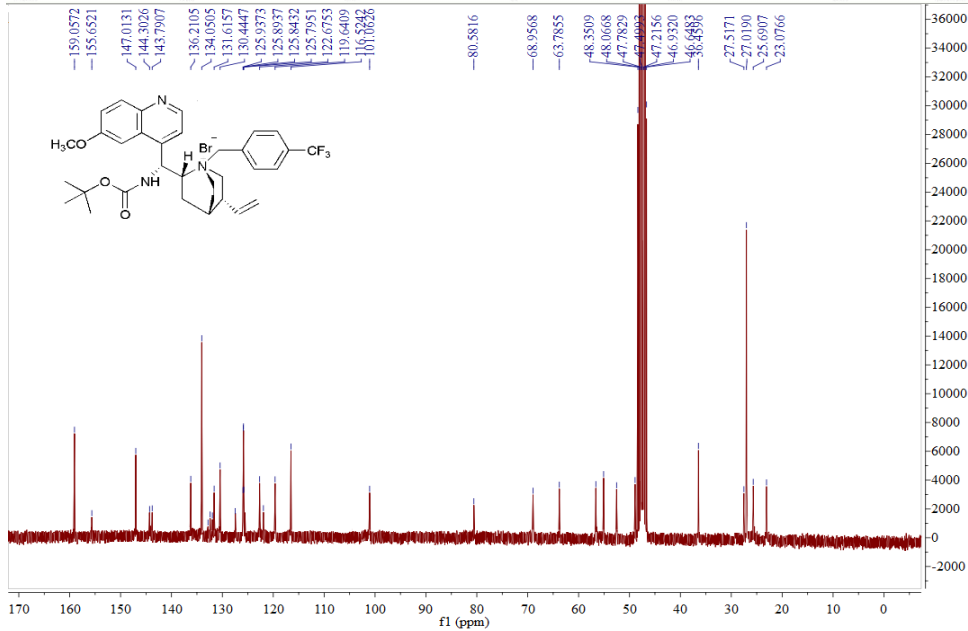

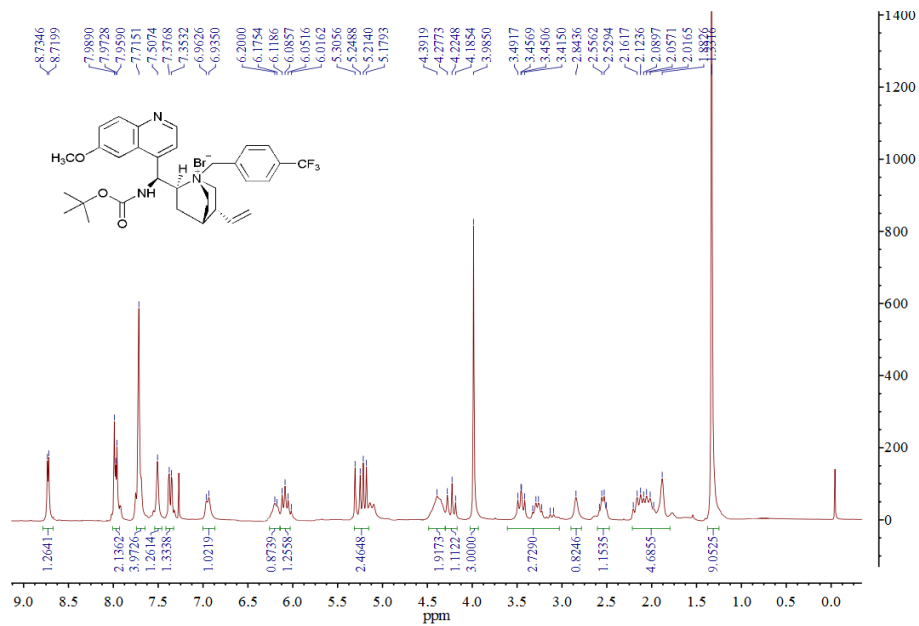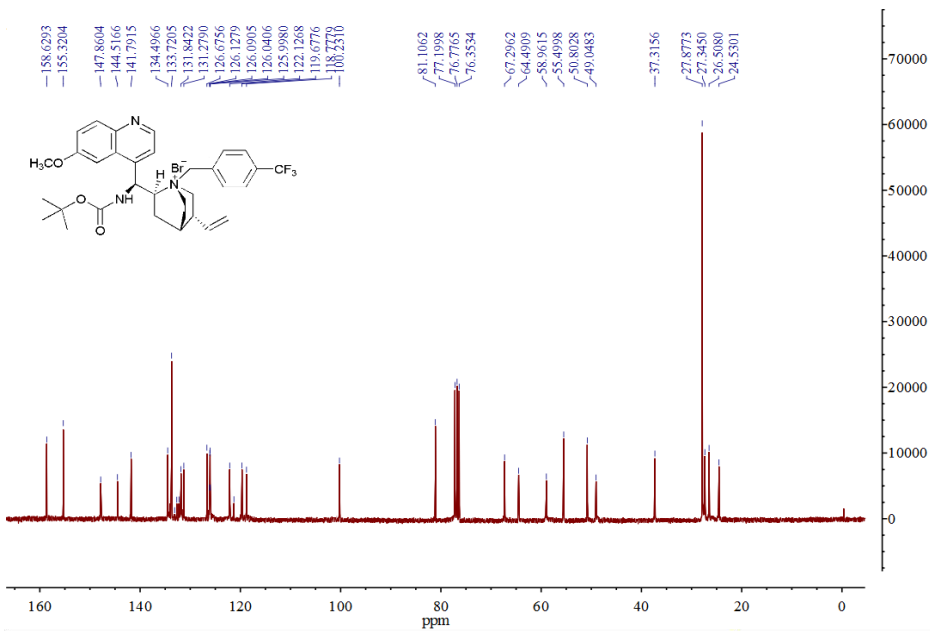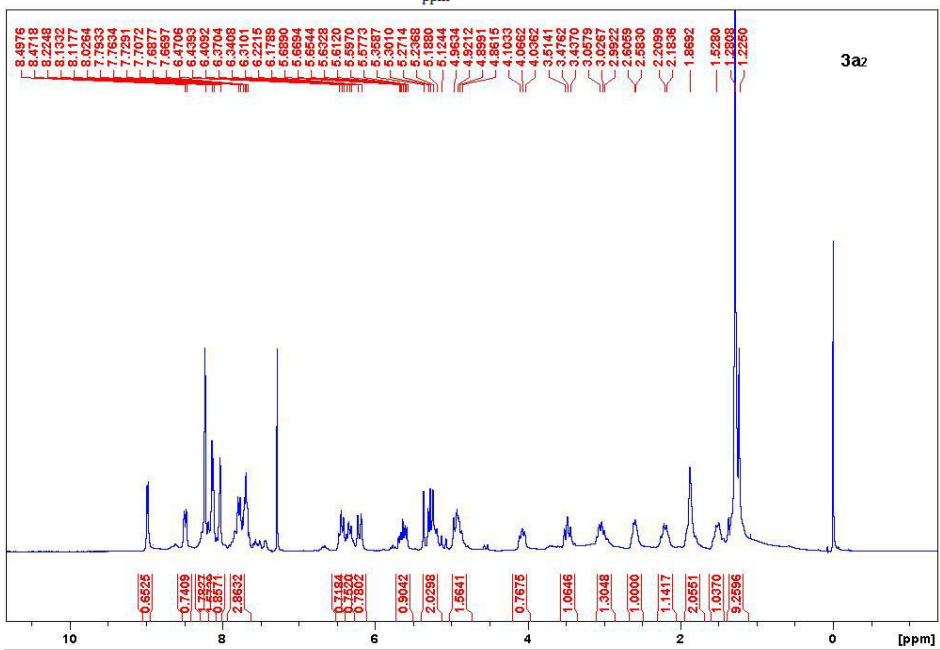

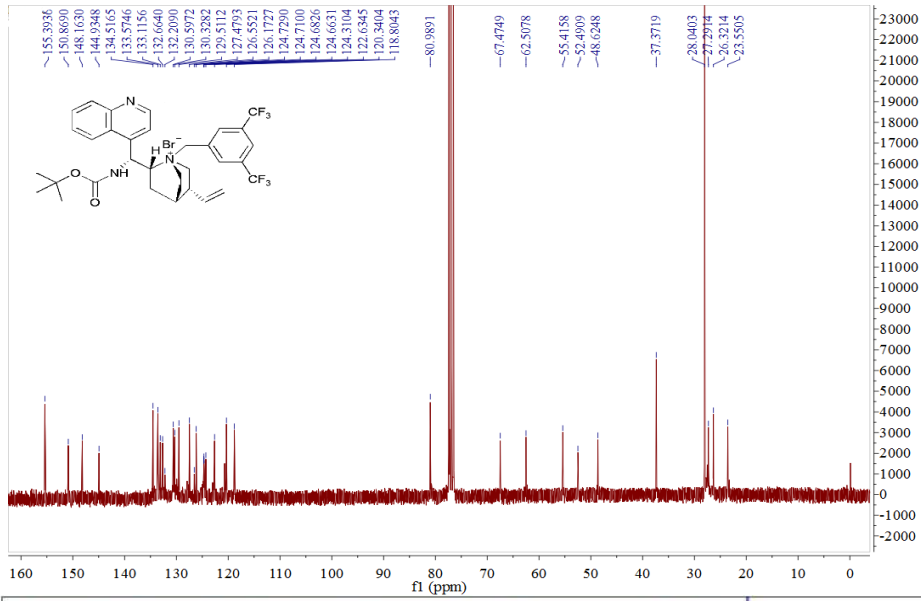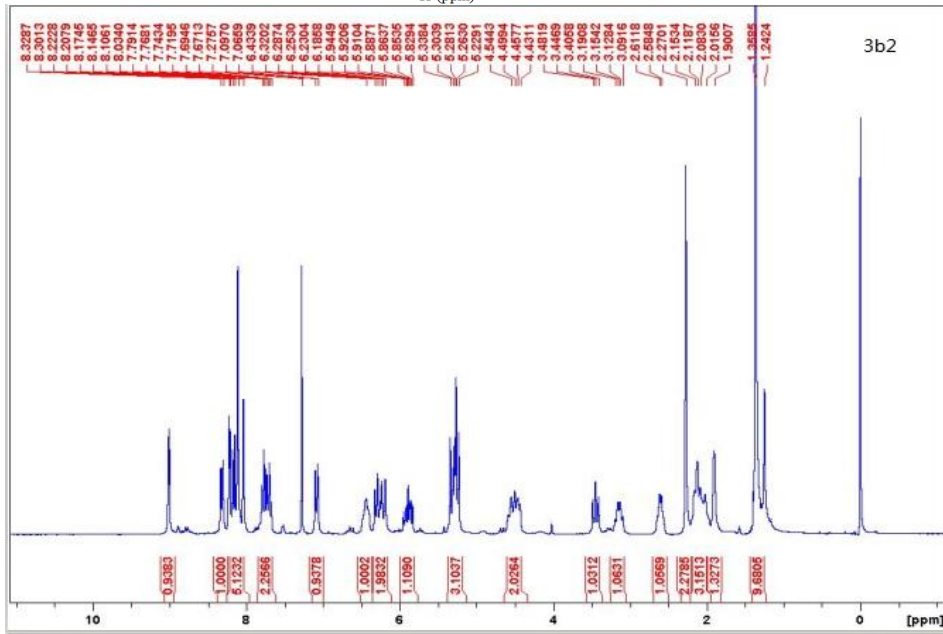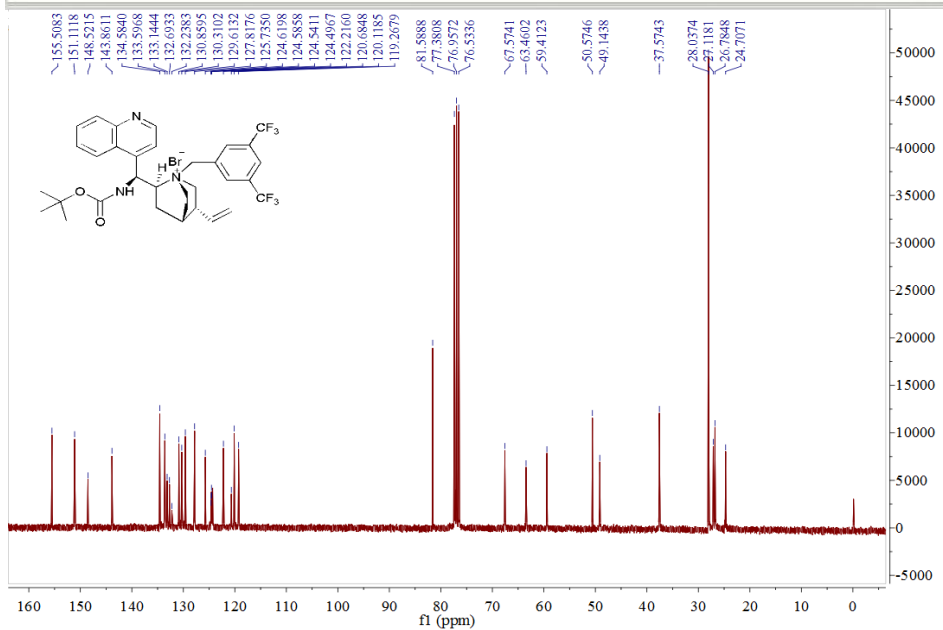

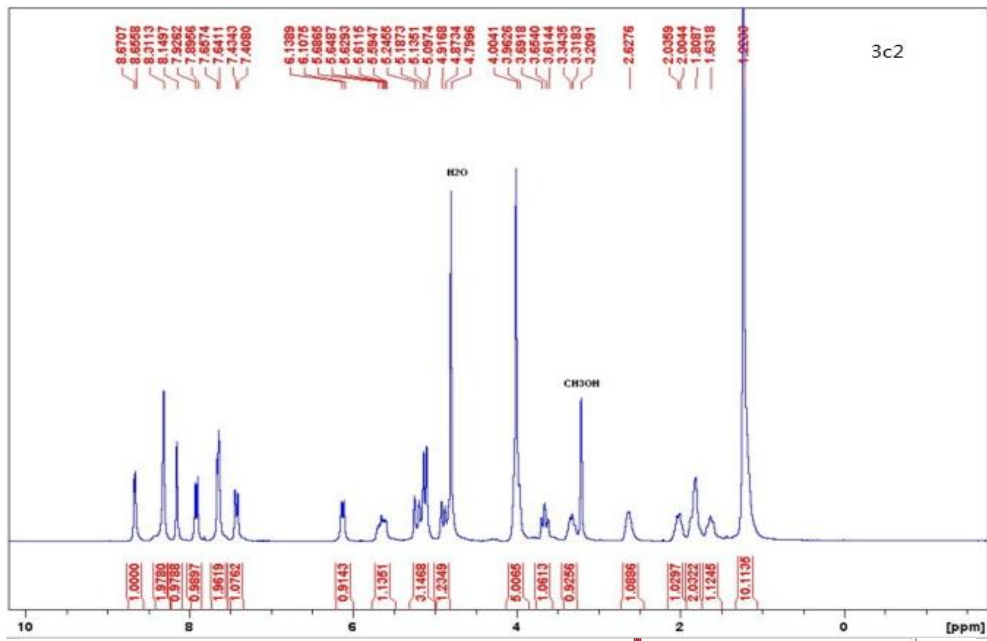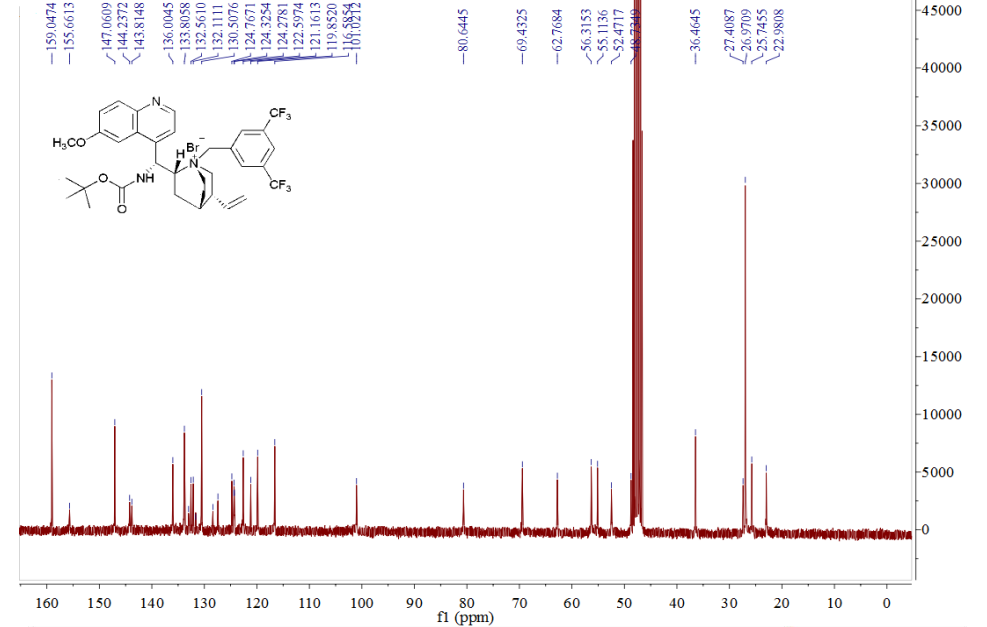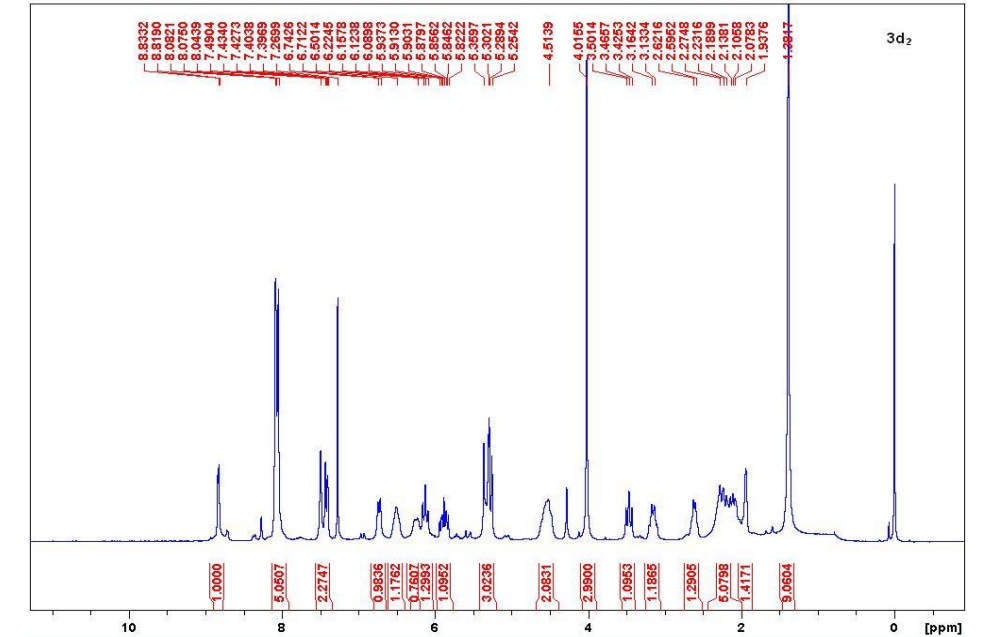



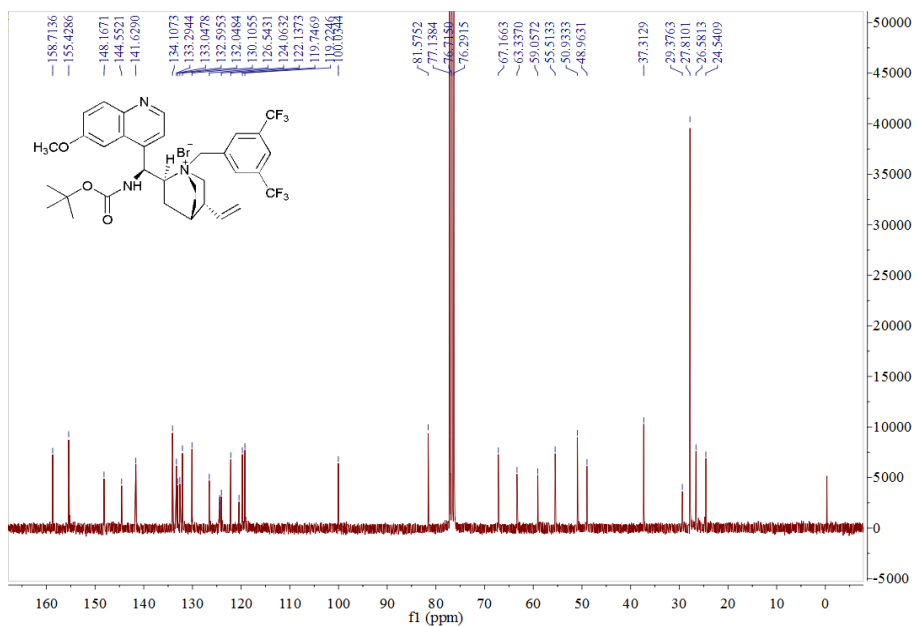

1.3 <sup>1</sup>H and <sup>13</sup>C NMR spectra of catalysts **a<sub>1-d1</sub>** and **a<sub>2-d2</sub>**

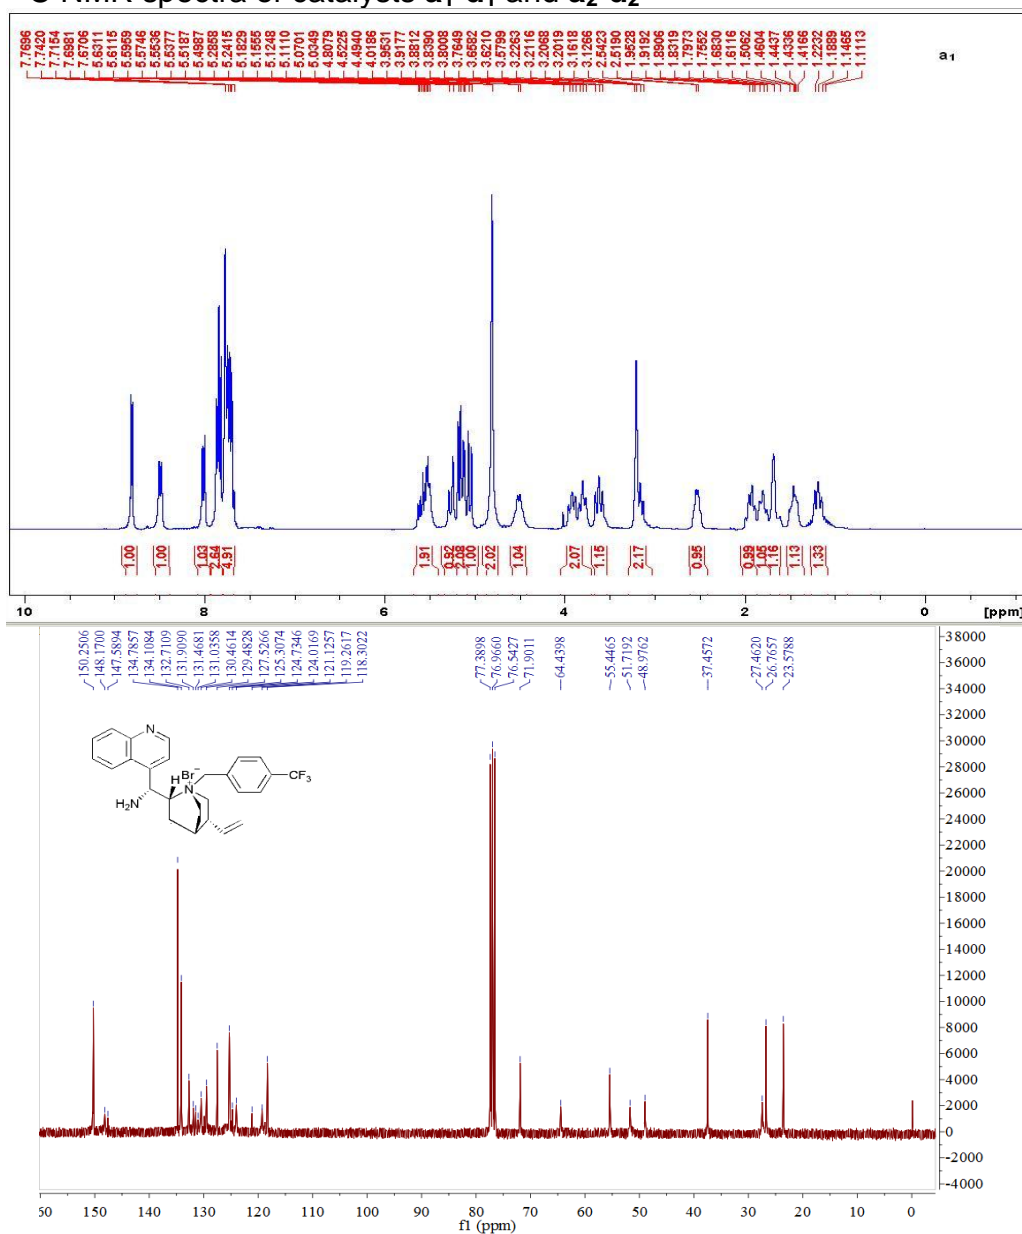

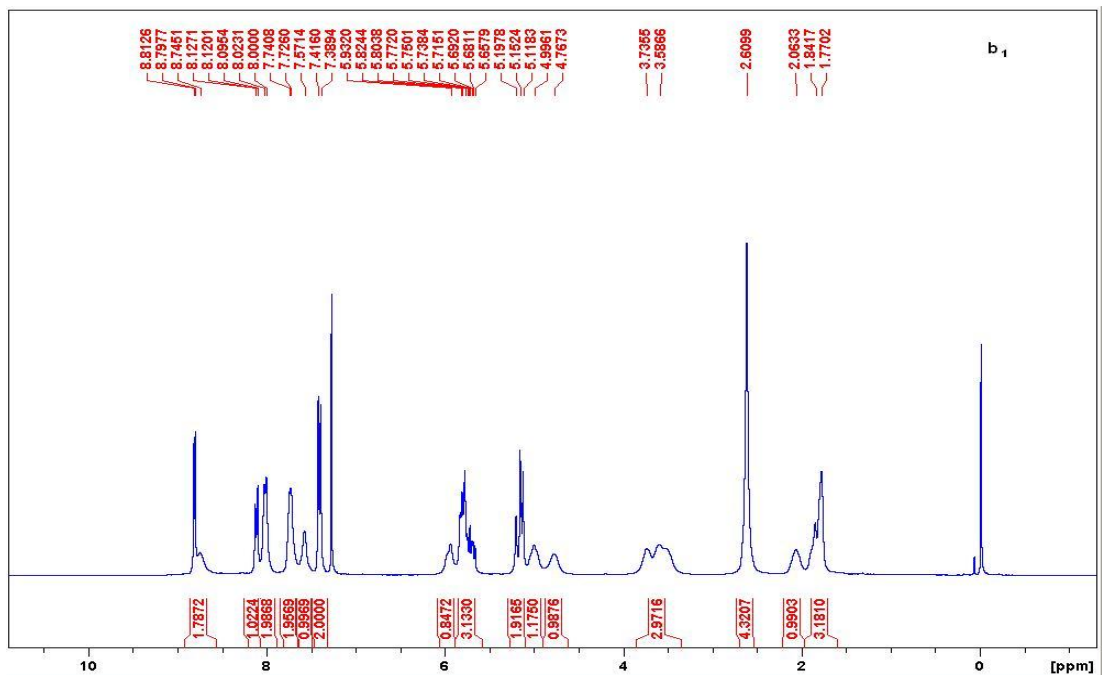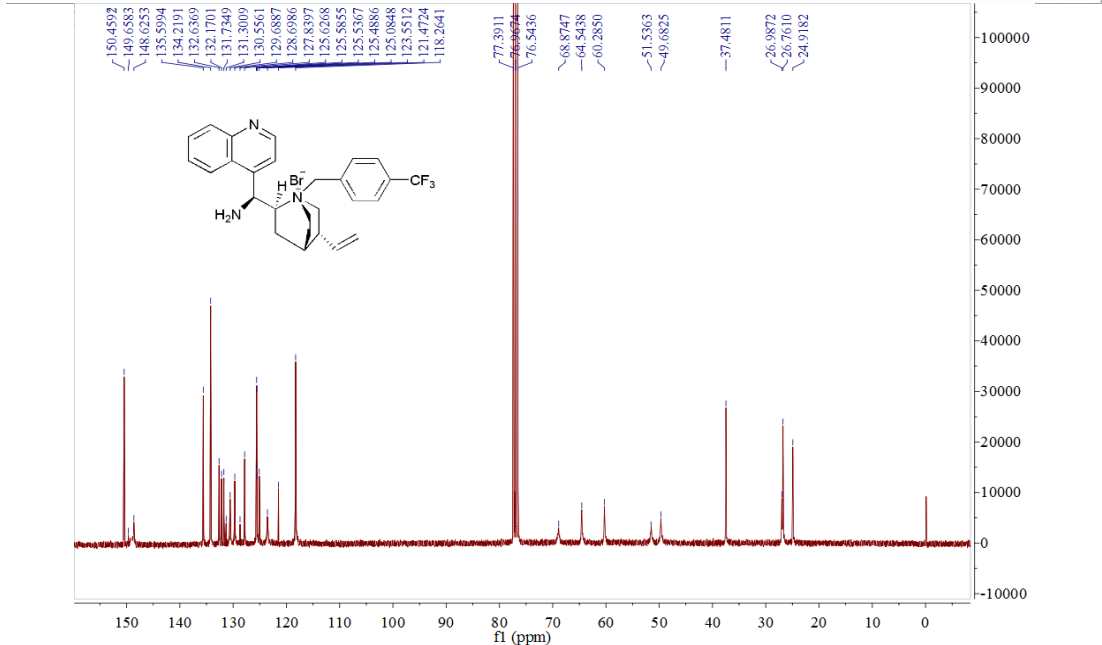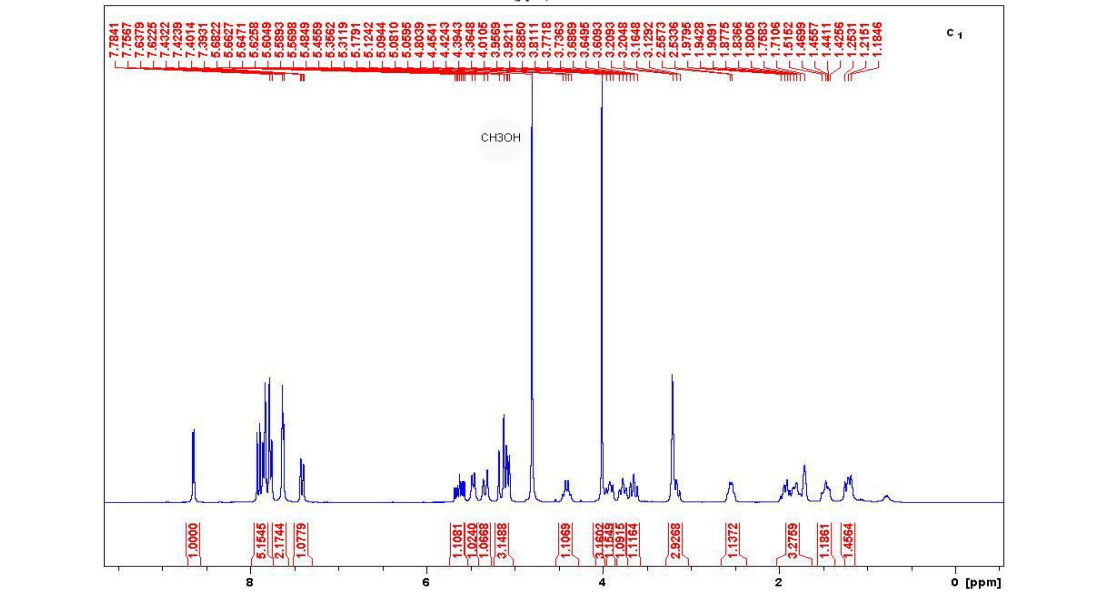

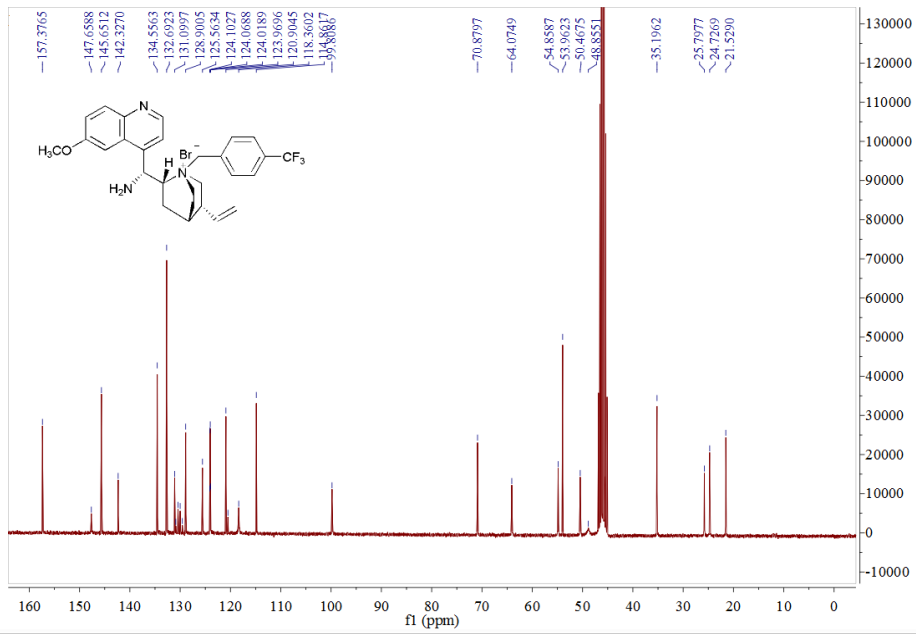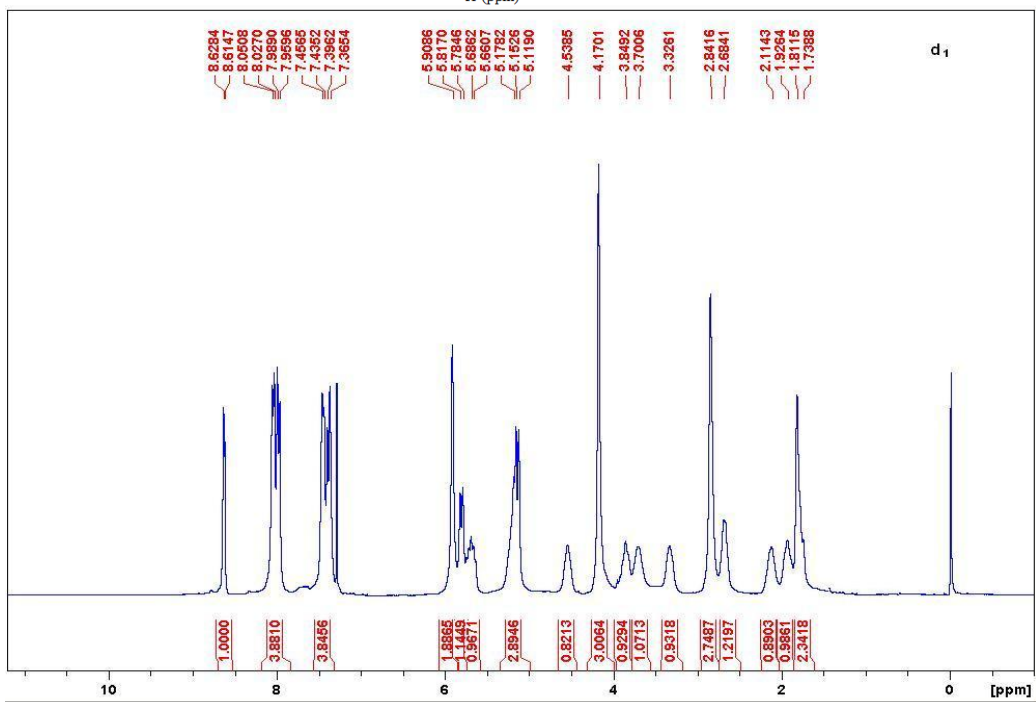

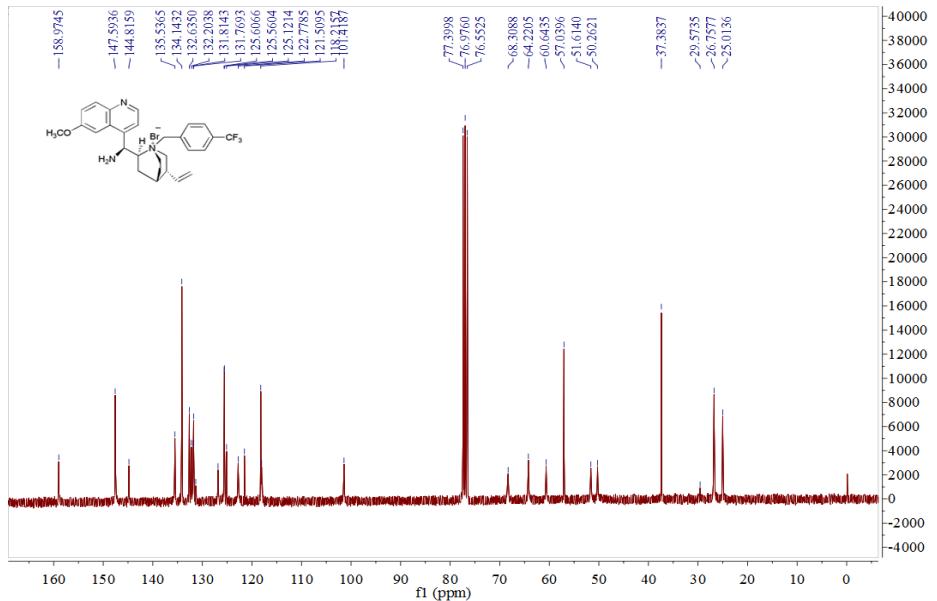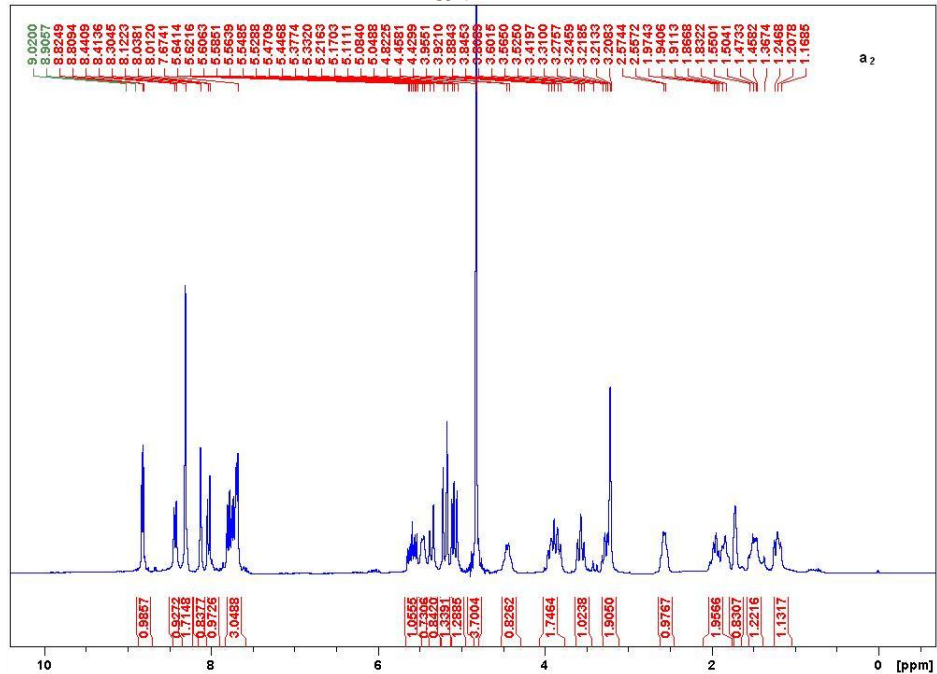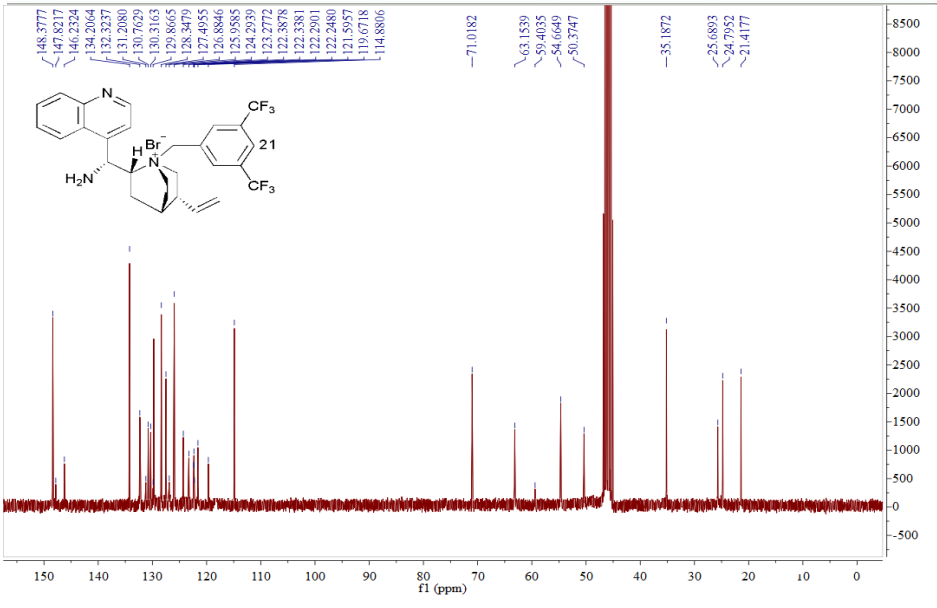

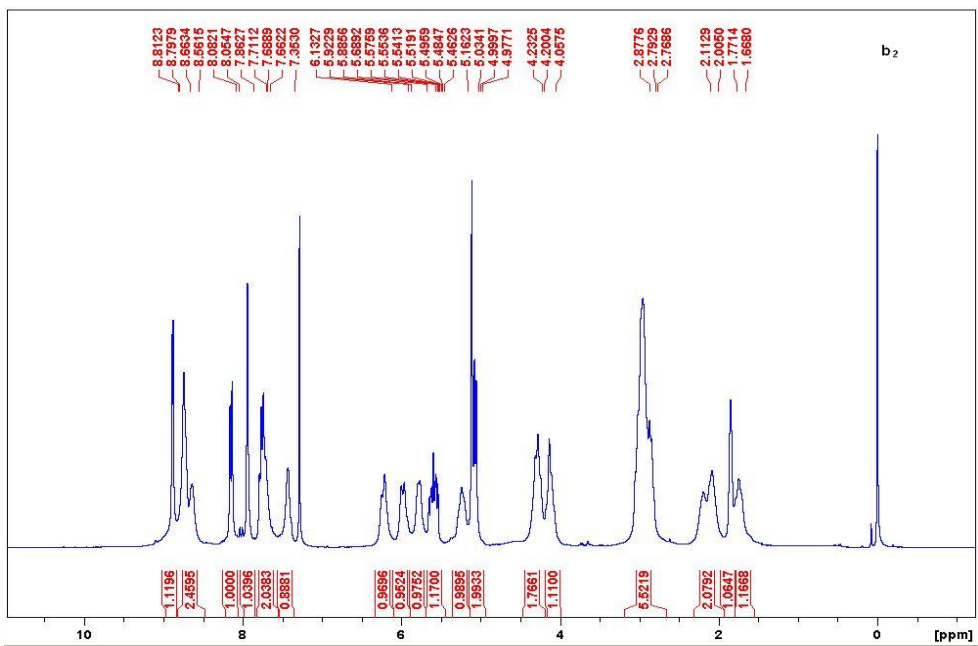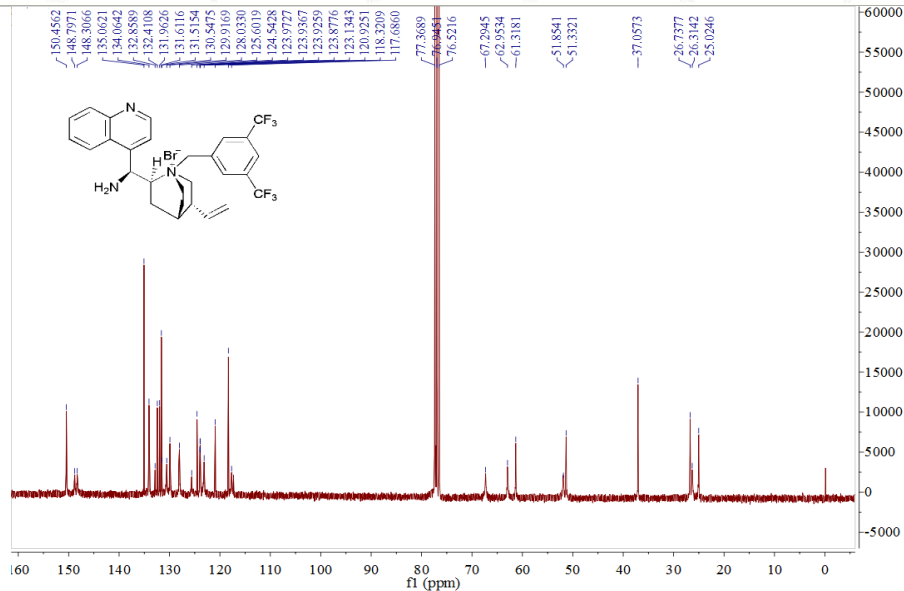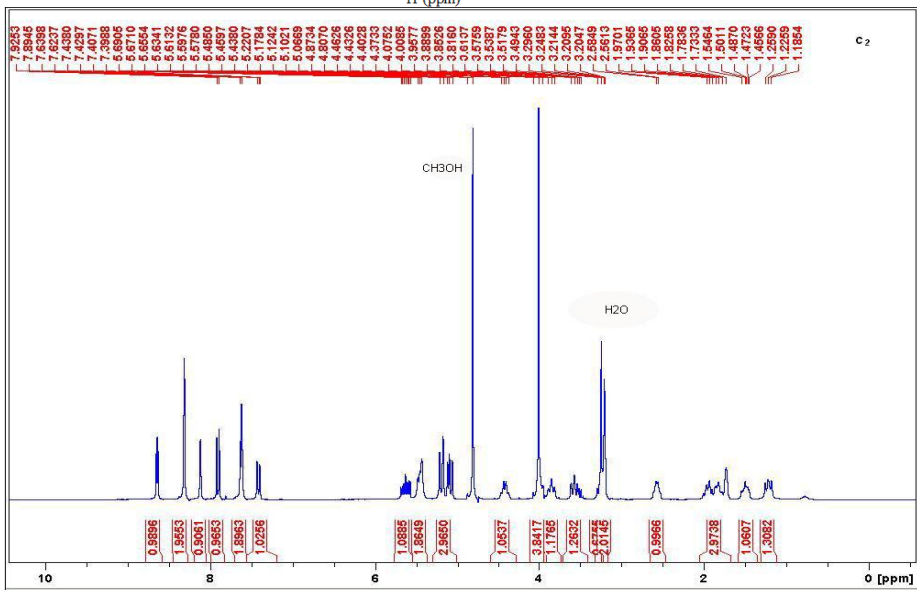

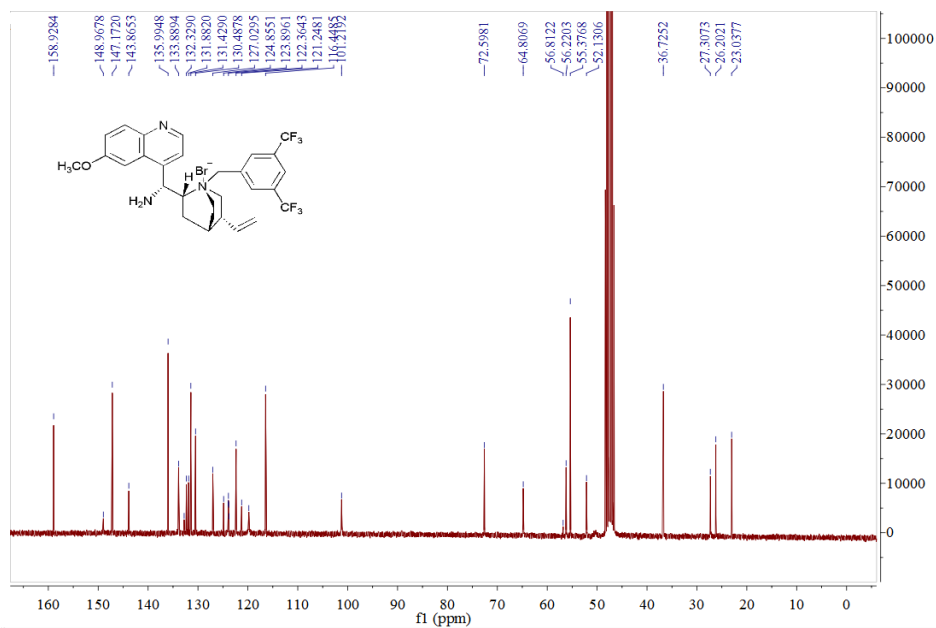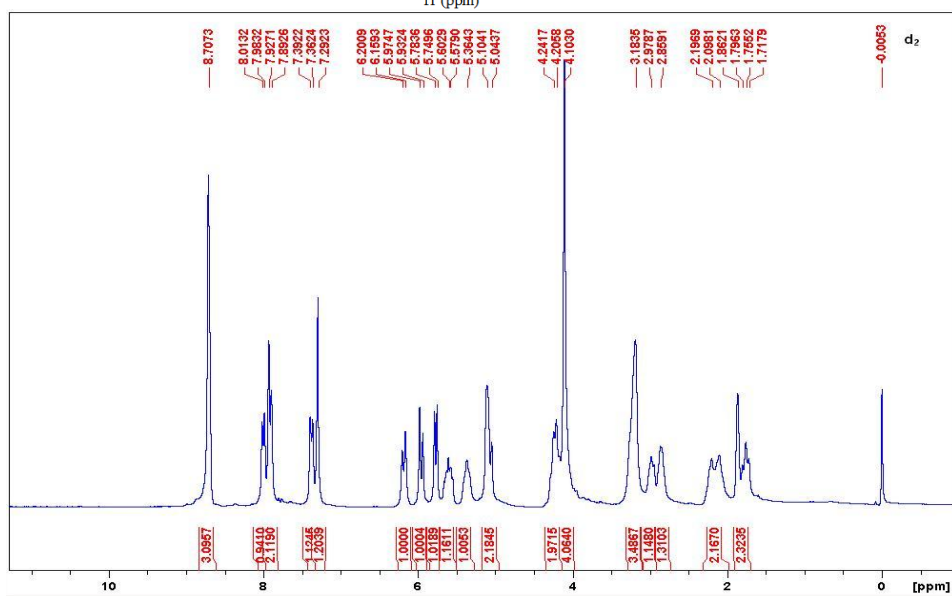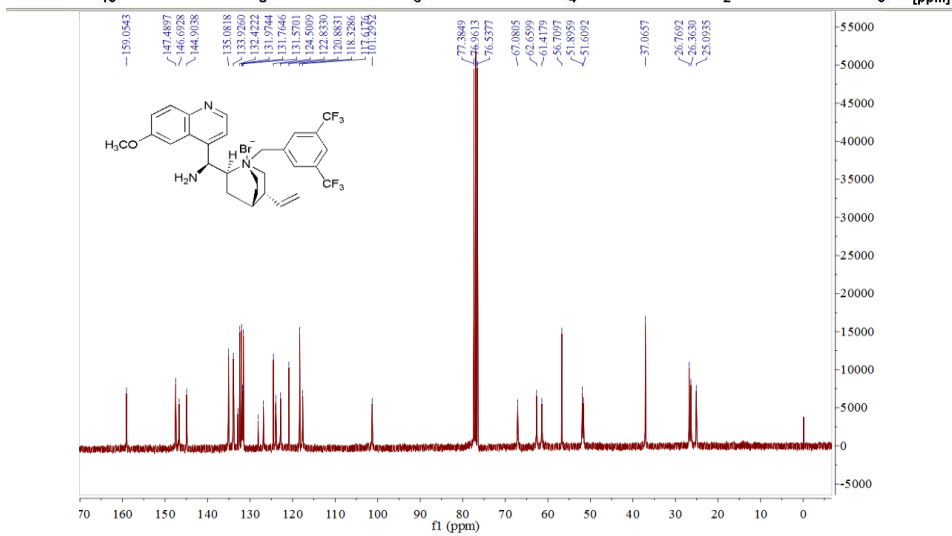

## 2. High resolution mass spectroscopy (HRMS)

# Peking University Mass Spectrometry Sample Analysis Report

**Analysis Info**

|               |                            |                  |                      |
|---------------|----------------------------|------------------|----------------------|
| Analysis Name | 14070546_20140721_000001.d | Acquisition Date | 7/21/2014 5:33:28 PM |
| Sample        | b1                         | Instrument       | Bruker Apex IV FTMS  |
| Comment       | ESI Positive               | Operator         | Peking University    |

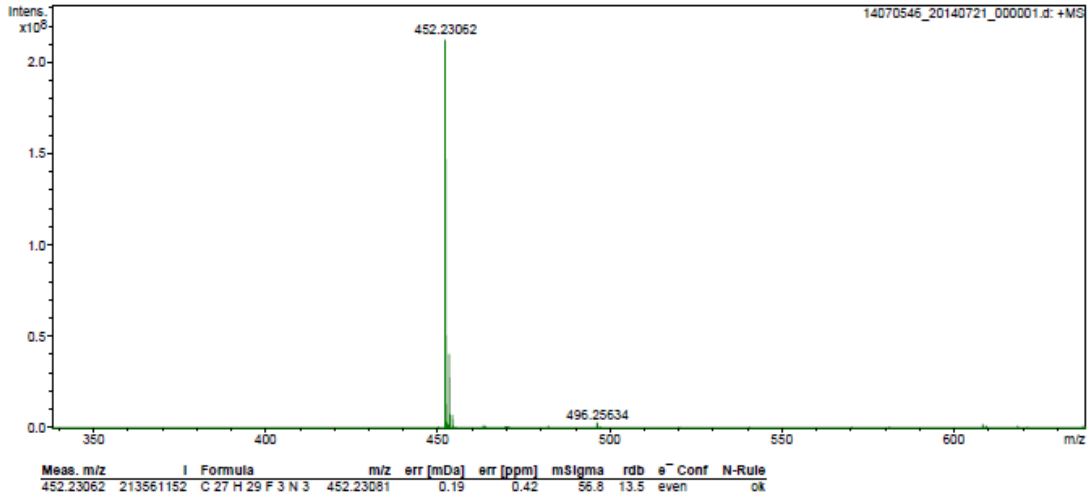

**Analysis Info**

|               |                            |                  |                      |
|---------------|----------------------------|------------------|----------------------|
| Analysis Name | 14070546_20140721_000002.d | Acquisition Date | 7/21/2014 5:34:55 PM |
| Sample        | b2                         | Instrument       | Bruker Apex IV FTMS  |
| Comment       | ESI Positive               | Operator         | Peking University    |

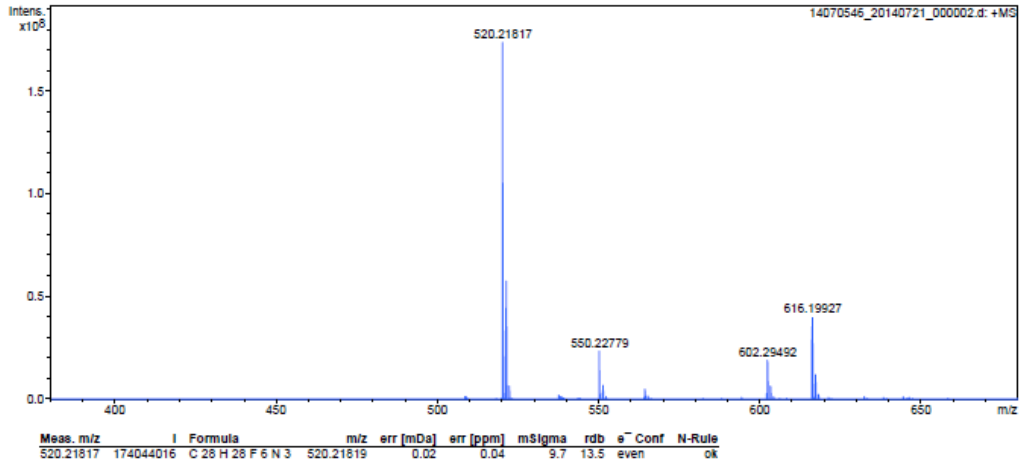

**Analysis Info**

|               |                            |                  |                      |
|---------------|----------------------------|------------------|----------------------|
| Analysis Name | 14070546_20140721_000003.d | Acquisition Date | 7/21/2014 5:37:52 PM |
| Sample        | d1                         | Instrument       | Bruker Apex IV FTMS  |
| Comment       | ESI Positive               | Operator         | Peking University    |

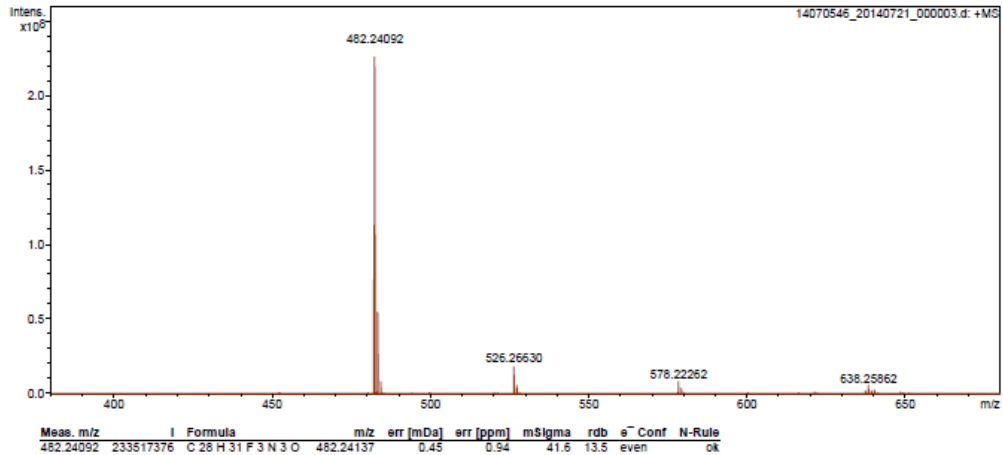

#### Analysis Info

Analysis Name 14070546\_20140721\_000004.d  
 Sample d2  
 Comment ESI Positive

Acquisition Date 7/21/2014 5:39:04 PM  
 Instrument Bruker Apex IV FTMS  
 Operator Peking University

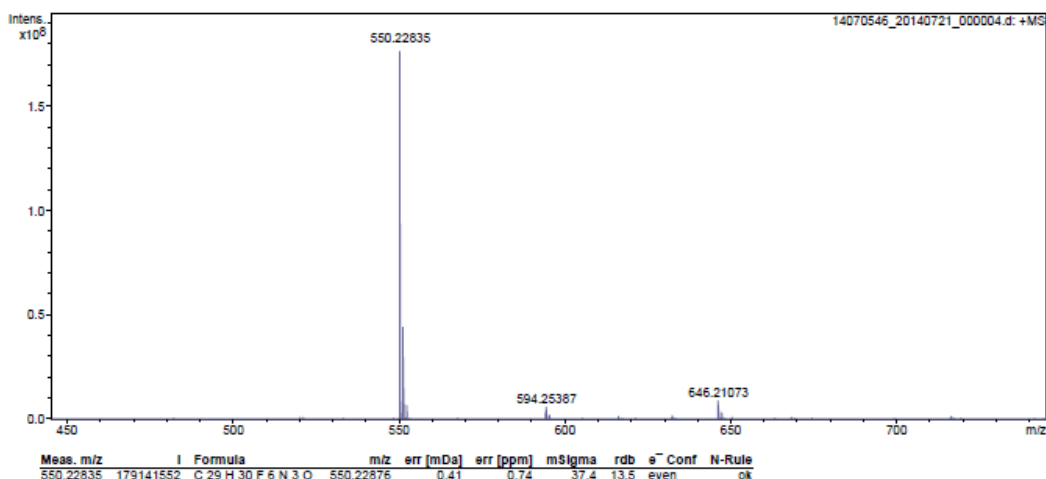

### 3. Synthesis of N-benzyl ammoniumsalts **b1'** and **b2'**

The first conversion of cinchonidine (CD) to 9-epimers of *cinchona* alkaloids (*epi*-CD) was achieved by one-pot inversion of Mitsunobu esterification–saponification (Ł. Sidorowicz, J. Skarzewski, *Synthesis*, 2011, **5**, 708-710).

The anhydrous THF solution (4 mL) containing CD (0.20 g, 0.68 mmol) and 3, 5-bis(trifluoromethyl)benzyl bromide (0.21 g, 0.68 mmol) or 4- trifluoromethyl benzyl bromide (0.16 g, 0.68 mmol) was stirred at 65 °C for 5 h. During this process, white solid gradually separate out. The white precipitate was filtered, washed with THF (3 mL ×2) and dried under reduced pressure to afford pure **b1'** and **b2'**, respectively in 79% and 88% yields.

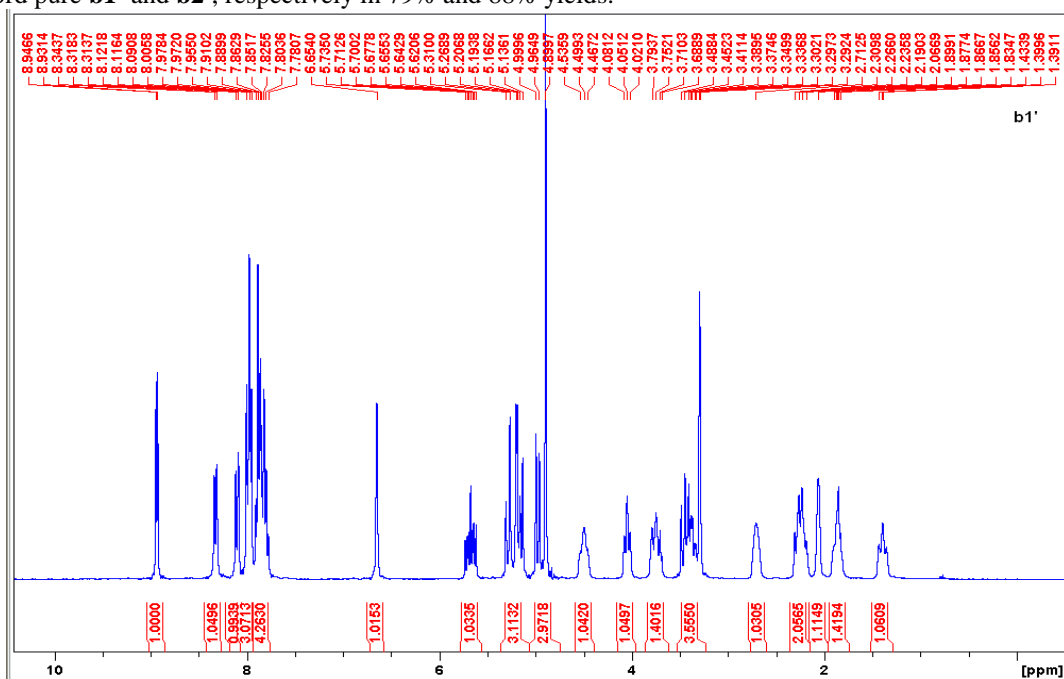



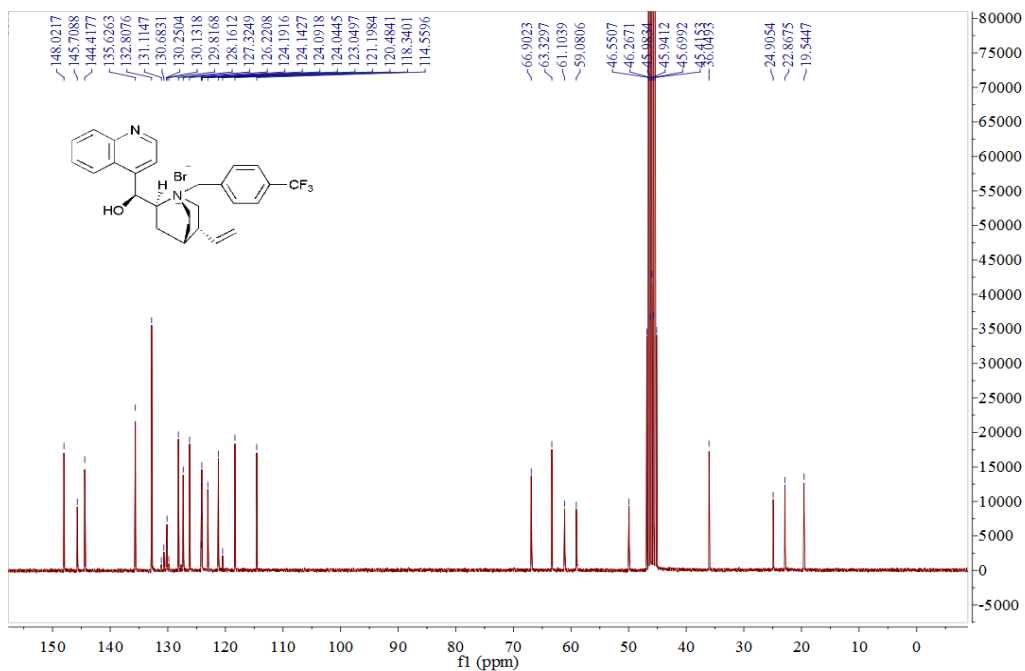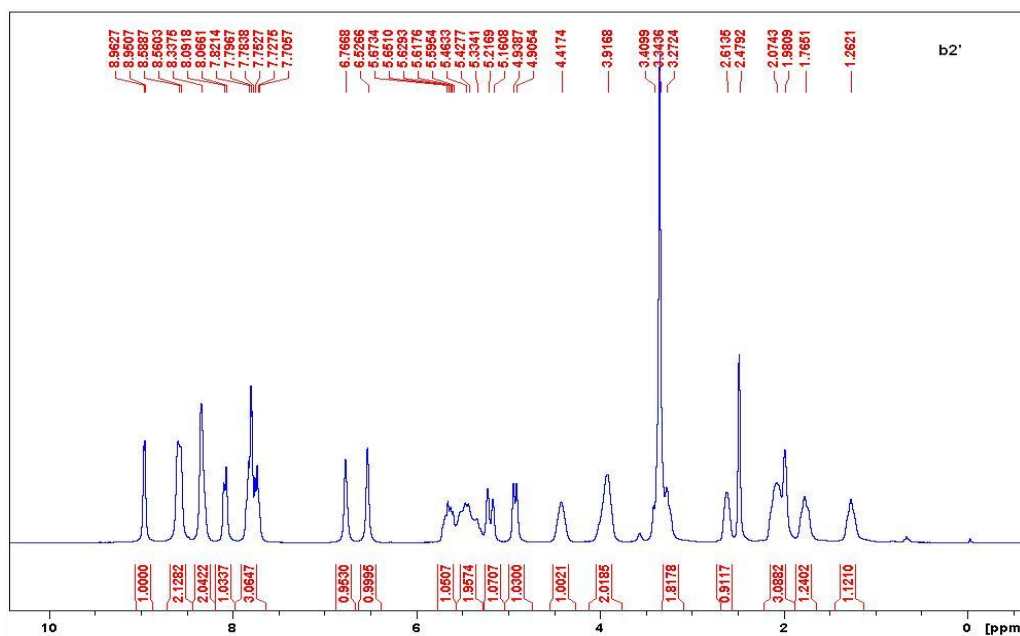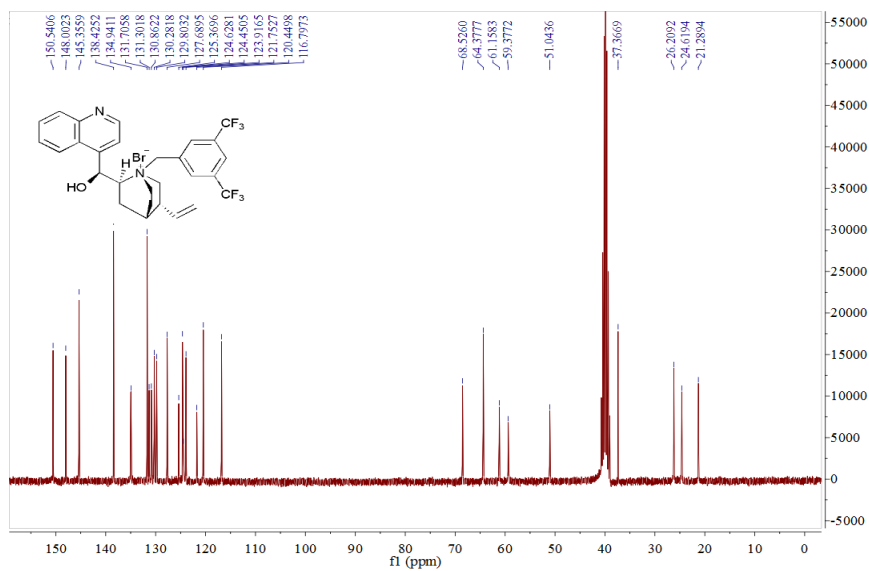

## 4. The optimization of catalytic conditions

The catalytic reaction conditions such as solvents, temperature, species and concentrations of base and used amounts of catalyst were carefully optimized and shown in Table 1-

**Table 1** The influence of various solvents on the catalytic performances <sup>a</sup>

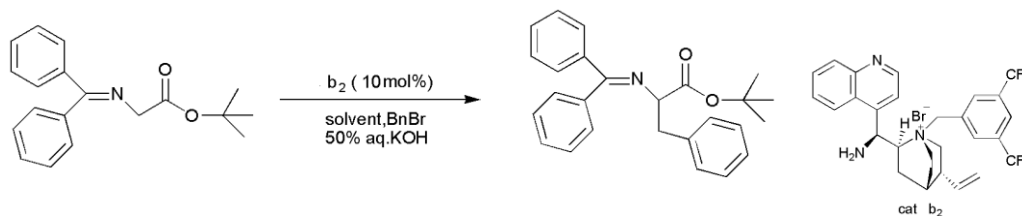

| Entry | Solvent                         | Yield [%] <sup>b</sup> | % ee <sup>c</sup> |
|-------|---------------------------------|------------------------|-------------------|
| 1     | CH <sub>2</sub> Cl <sub>2</sub> | 85                     | -                 |
| 2     | <i>t</i> -BuOCH <sub>3</sub>    | 99                     | 60.7( <i>R</i> )  |
| 3     | CH <sub>3</sub> OH              | -                      | -                 |
| 4     | acetone                         | 90                     | 5( <i>R</i> )     |
| 5     | toluene                         | 98                     | 73.9( <i>R</i> )  |
| 6     | EAc                             | 98                     | 30.6( <i>R</i> )  |
| 7     | CH <sub>3</sub> CN              | 98                     | 5.0( <i>R</i> )   |
| 8     | DMF                             | 99                     | -                 |
| 9     | CHCl <sub>3</sub>               | -                      | -                 |
| 10    | DMSO                            | -                      | -                 |
| 11    | ether                           | 99                     | 82.5( <i>R</i> )  |

<sup>a</sup> Reaction conditions: **b**<sub>2</sub>, S=0.1 mmol, S/C=10, -20 °C, 12 h, Solvent: 2 mL, KOH: 50% aq 0.4mL.

<sup>b</sup> Isolated yield.

<sup>c</sup> Determined by charil HPLC.

**Table 2** The influence of reaction temperature on catalytic performances<sup>a</sup>

| Entry | Temp.[°C] | Time | Yield [%] <sup>b</sup> | % ee <sup>c</sup> |
|-------|-----------|------|------------------------|-------------------|
| 1     | 25        | 5    | 99                     | 49.0( <i>R</i> )  |
| 2     | 0         | 5    | 99                     | 67.0( <i>R</i> )  |
| 3     | -20       | 8    | 99                     | 82.5( <i>R</i> )  |
| 4     | -40       | 12   | 97                     | 90.5( <i>R</i> )  |
| 5     | -60       | 24   | 73                     | 71.3( <i>R</i> )  |

<sup>a</sup> Reaction conditions: **b**<sub>2</sub>, S=0.1 mmol, S/C=10, ether: 2 mL, KOH: 50% aq 0.4 mL

<sup>b</sup> Isolated yield.

<sup>c</sup> Determined by charil HPLC.

**Table 3 The influence of various base on catalytic performances <sup>a</sup>**

| Entry | Base        | Yield [%] <sup>b</sup> | %ee <sup>c</sup> |
|-------|-------------|------------------------|------------------|
| 1     | <b>LiOH</b> | 52                     | 52.1( <i>R</i> ) |
| 2     | <b>NaOH</b> | 63                     | 59.8( <i>R</i> ) |
| 3     | <b>KOH</b>  | 97                     | 90.5( <i>R</i> ) |
| 4     | <b>CsOH</b> | 60                     | 65.0( <i>R</i> ) |

<sup>a</sup> Reaction conditions: **b**<sub>2</sub>, S=0.1 mmol, S/C=10, -40 °C, 12 h, ether: 2 mL, MOH: 50% aq 0.4 mL (LiOH:11%).

<sup>b</sup> Isolated yield.

<sup>c</sup> Determined by charil HPLC.

**Table 4 The influence of concentration of the base on catalytic performances <sup>a</sup>**

| Entry | Wt (%)    | Base | Yield [%] <sup>b</sup> | %ee <sup>c</sup> |
|-------|-----------|------|------------------------|------------------|
| 1     | <b>10</b> | KOH  | 13                     | 85.3( <i>R</i> ) |
| 2     | <b>20</b> | KOH  | 21                     | 83.8( <i>R</i> ) |
| 3     | <b>30</b> | KOH  | 58                     | 88.7( <i>R</i> ) |
| 4     | <b>40</b> | KOH  | 62                     | 88.2( <i>R</i> ) |
| 5     | <b>50</b> | KOH  | 97                     | 90.5( <i>R</i> ) |

<sup>a</sup> Reaction conditions: **b**<sub>2</sub>, S=0.1 mmol, S/C=10, -40 °C, 12 h, ether: 2 mL, KOH: 0.4 mL

<sup>b</sup> Isolated yield.

<sup>c</sup> Determined by charil HPLC.

**Table 5 The influence of loading amount on catalytic performances <sup>a</sup>**

| Entry | S/C | Cat. (mol%) | Yield [%] <sup>b</sup> | %ee <sup>c</sup> |
|-------|-----|-------------|------------------------|------------------|
| 1     | 20  | 5           | 98                     | 87.9( <i>R</i> ) |
| 2     | 10  | 10          | 97                     | 90.5( <i>R</i> ) |
| 3     | 7   | 15          | 84                     | 87.9( <i>R</i> ) |
| 4     | 5   | 20          | 82                     | 87.9( <i>R</i> ) |
| 5     | 4   | 25          | 78                     | 85.7( <i>R</i> ) |

<sup>a</sup> Reaction conditions: **b**<sub>2</sub>, S=0.1 mmol, -40 °C, 12 h, ether: 2 mL, KOH: 50% aq. 0.4 mL.

<sup>b</sup> Isolated yield.

<sup>c</sup> Determined by charil HPLC.

## 5. The data of catalytic products

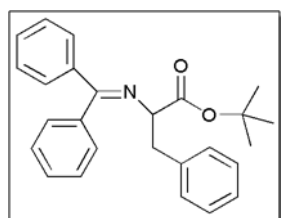

<sup>1</sup>H NMR (300 MHz, CDCl<sub>3</sub>, TMS): δ 7.52 (d, 2 H, <sup>3</sup>J=7.0 Hz, Ph-H), 7.30–7.00 (m, 11 H, Ph-H), 6.54 (d, 2H, <sup>3</sup>J=6.4 Hz, Ph-H), 4.06 (dd, 1 H, <sup>3</sup>J = 4.4 Hz, 4.4 Hz, CH), 3.22–3.07 (m,

2 H, CH<sub>2</sub>), 1.39 (s, 9 H, CH<sub>3</sub>). <sup>13</sup>C NMR (75 MHz, CDCl<sub>3</sub>, TMS): δ 170.8, 170.2 (C=N, C=O), 139.5, 138.3, 137.5, 136.3, 132.4, 130.0, 129.8, 129.3, 128.6, 128.4, 128.2, 128.1, 128.0, 128.0, 127.9, 127.6, 126.6, 126.1, 81.1 (O-C), 67.9 (CH), 39.5 (CH<sub>2</sub>), 28.0 (CH<sub>3</sub>). Rt HPLC (Daicel Chiralpak OD-H, 95:5, hexane/dioxane, 254 nm, 0.5 ml/min), 10.0 min (*R*-isomer), 11.9min (*S*-isomer).

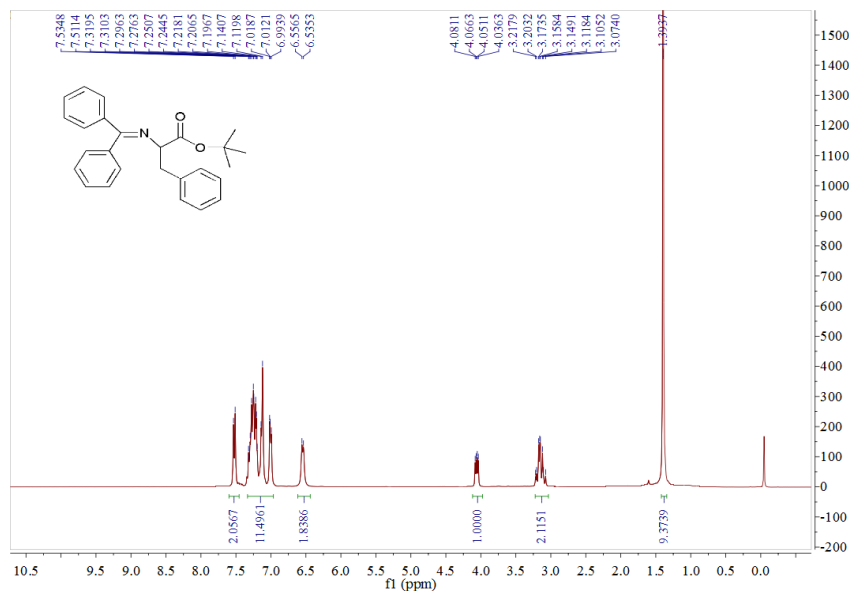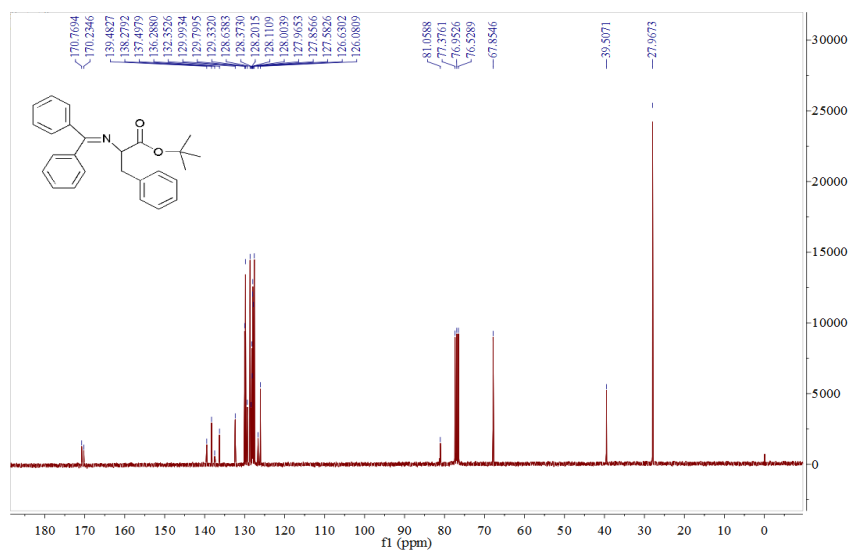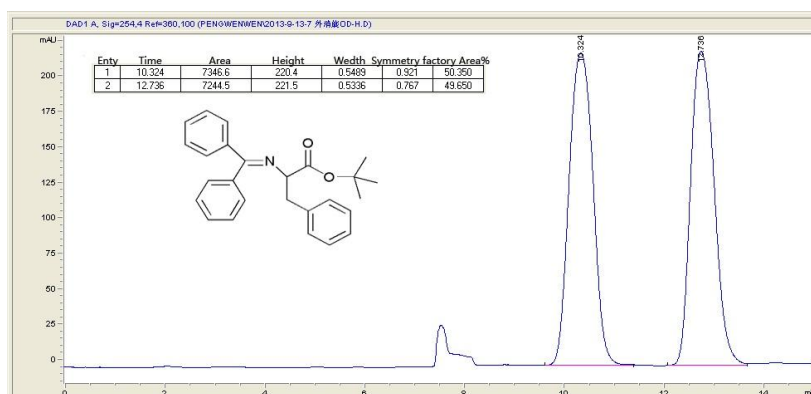

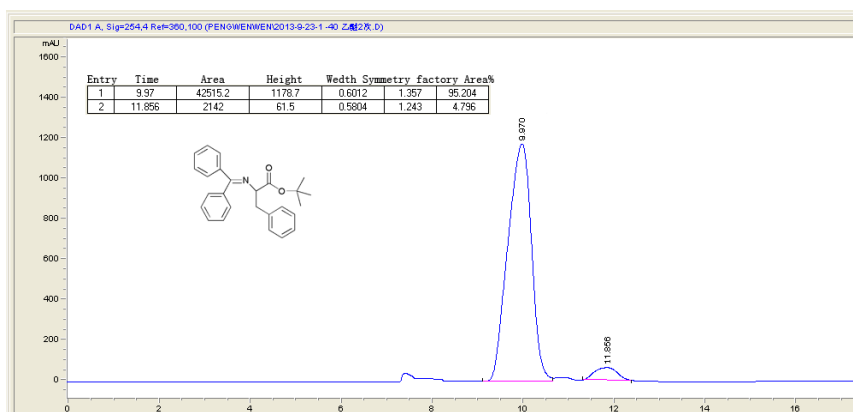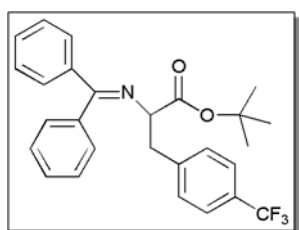

$^1\text{H NMR}$  (300 MHz,  $\text{CDCl}_3$ , TMS):  $\delta$  7.54 (d, 2 H,  $^3J = 7.1$  Hz, Ph-H), 7.40 (d, 2 H,  $^3J = 7.9$  Hz, Ph-H), 7.37–7.21 (m, 6 H, Ph-H), 7.13 (d, 2 H,  $^3J = 7.9$  Hz, Ph-H), 6.58 (d, 2 H,  $^3J = 6.4$  Hz, Ph-H), 4.10 (dd, 1 H,  $^3J = 4.4$  Hz, 4.4 Hz, CH), 3.27–3.14 (m, 2 H,  $\text{CH}_2$ ), 1.41 (s, 9 H,  $\text{CH}_3$ ).  $^{13}\text{C NMR}$  (75 MHz,  $\text{CDCl}_3$ , TMS):  $\delta$  170.7, 170.4 (C=N, C=O), 142.6 (q,  $^3J_{\text{C-F}} = 1.3$  Hz), 139.2, 137.5, 136.0, 132.4, 130.3, 130.1, 130.0, 130.0, 129.7, 128.6, 128.3, 128.2, 128.1, 128.0, 127.4, 126.0, 125.2 (q,  $^2J_{\text{C-F}} = 3.8$  Hz), 124.9 (q,  $^1J_{\text{C-F}} = 3.8$  Hz,  $\text{CF}_3$ ), 81.4 (O-C), 67.4 (CH), 39.2 ( $\text{CH}_2$ ), 27.9 ( $\text{CH}_3$ ). Rt HPLC (Daicel Chiralpak OD-H, 95:5, hexane/dioxane, 254 nm, 0.5 ml/min), 9.6 min (*S*-isomer), 11.1min (*R*-isomer).

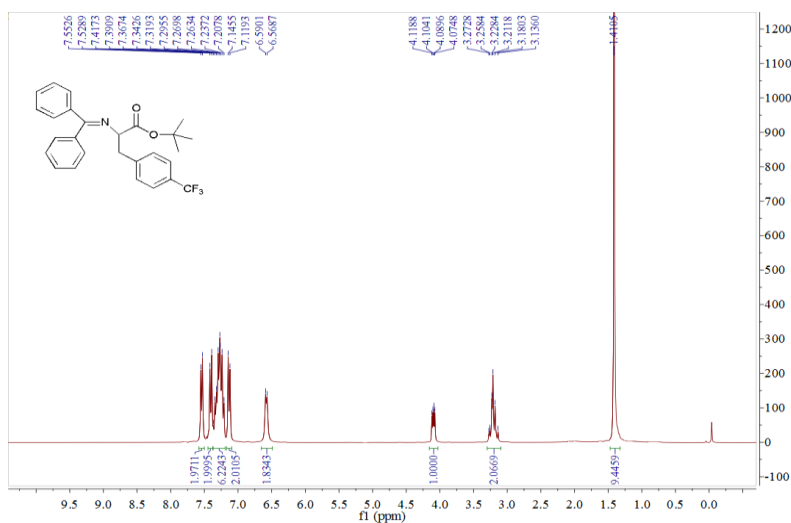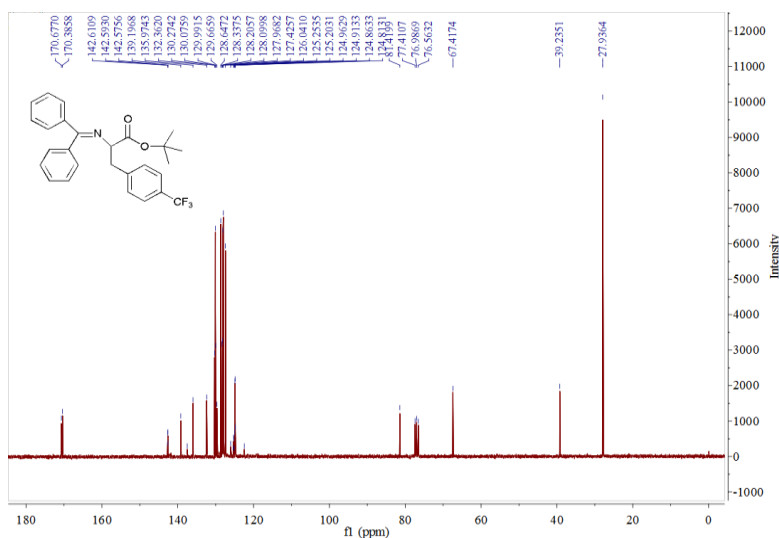

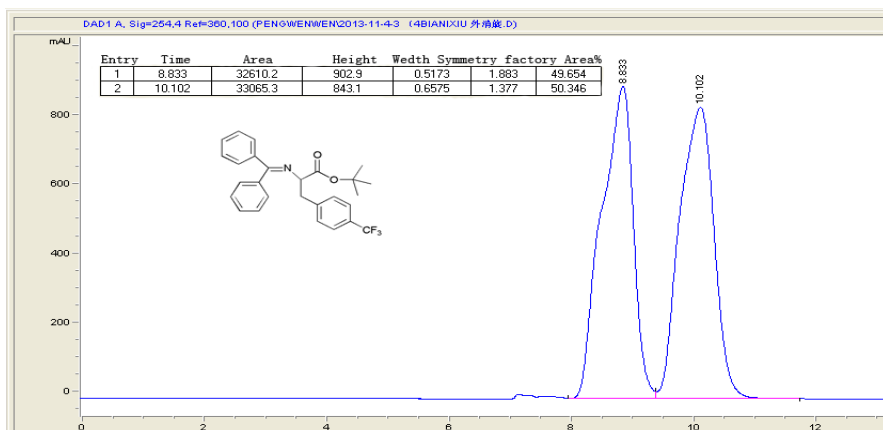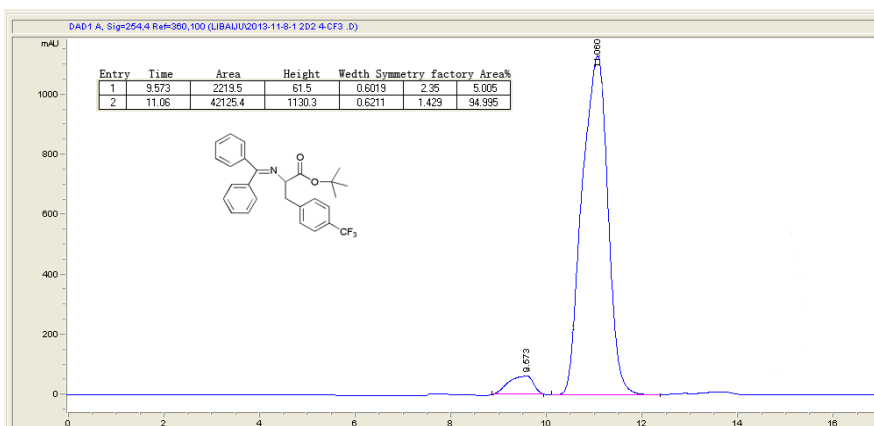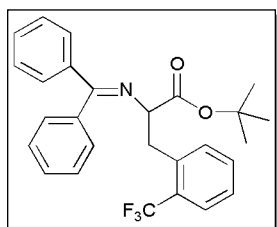

$^1\text{H}$  NMR (300 MHz,  $\text{CDCl}_3$ , TMS):  $\delta$  7.76 (d, 1 H,  $^3J=7.1$  Hz, Ph-H), 7.57–7.41 (m, 4 H, Ph-H), 7.35–7.15 (m, 7 H, Ph-H), 6.43 (d, 2 H,  $^3J=6.4$  Hz, Ph-H), 4.13 (dd, 1 H,  $^3J=3.5$  Hz, 3.5 Hz, CH), 3.50–3.22 (m, 2 H,  $\text{CH}_2$ ), 1.39 (s, 9 H,  $\text{CH}_3$ ).  $^{13}\text{C}$  NMR (75 MHz,  $\text{CDCl}_3$ , TMS):  $\delta$  170.7, 170.5 (C=N, C=O), 139.2, 136.8 ( $q$ ,  $^2J_{\text{C-F}}=1.6$  Hz), 136.0, 133.3, 132.4, 131.1, 130.2, 131.0, 129.6, 128.7, 128.2, 128.1, 127.9, 127.9, 127.3, 126.3, 126.0 (Ph), 125.7

( $q$ ,  $^1J_{\text{C-F}}=5.7$  Hz,  $\text{CF}_3$ ), 81.2 (O-C), 66.5 (CH), 36.0 ( $\text{CH}_2$ ), 27.9 ( $\text{CH}_3$ ). Rt HPLC (Phenomenex Lux 5u Amylose-2, 95:5, hexane/dioxane, 254 nm, 0.5 ml/min), 10.8 min (*R*-isomer), 13.5min (*S*-isomer).

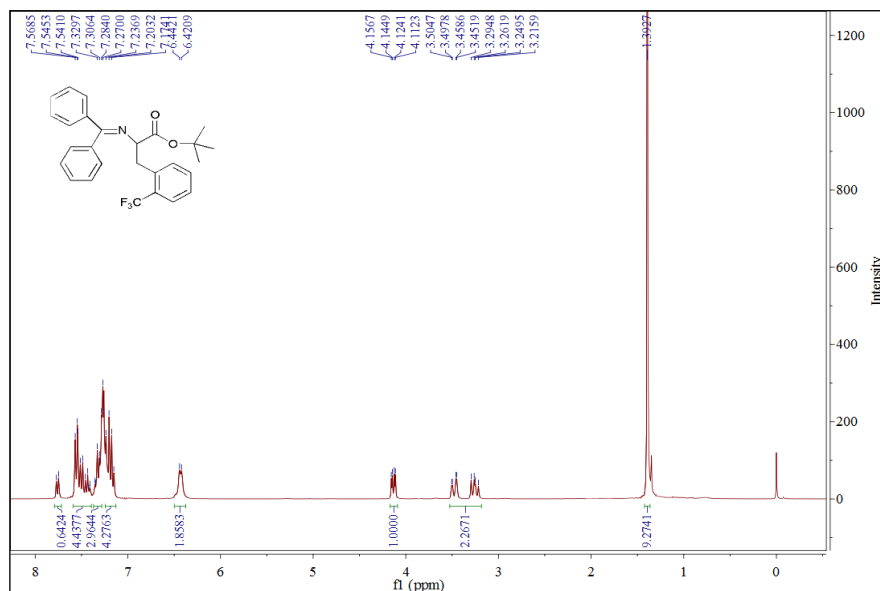

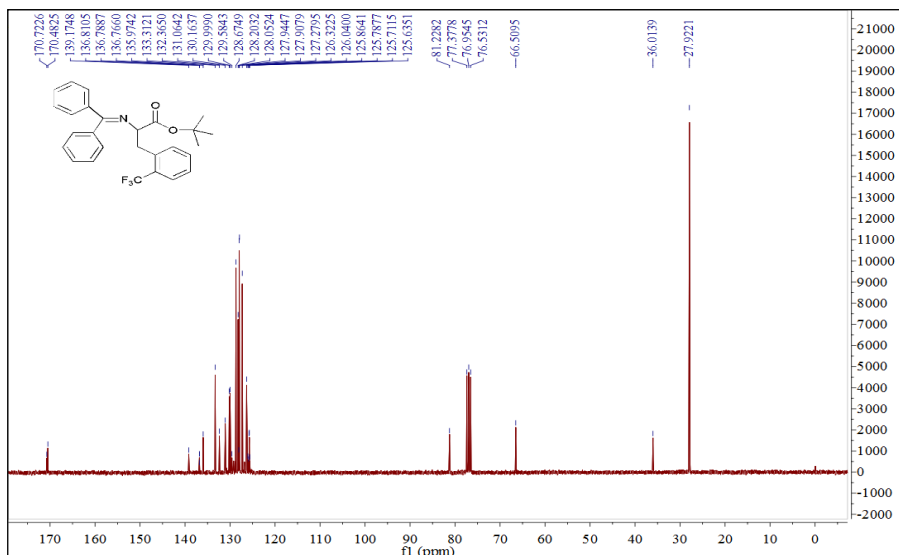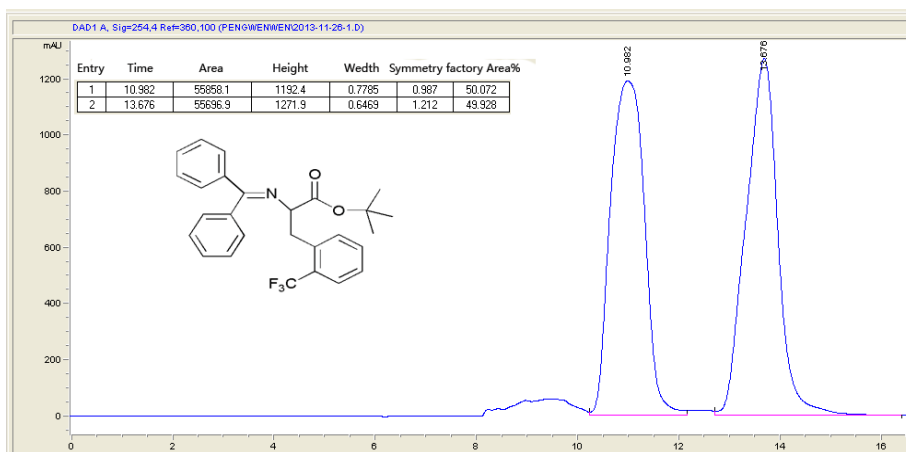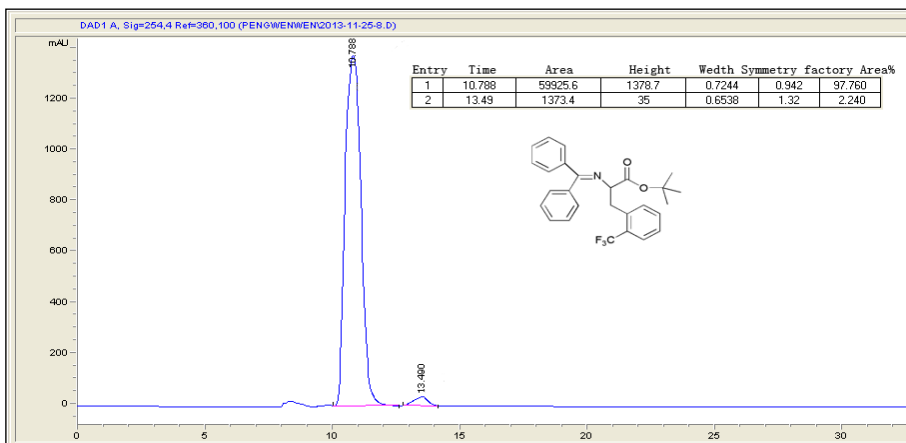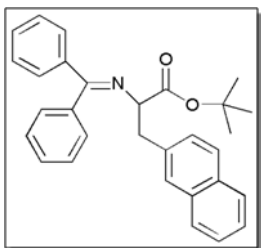

$^1\text{H NMR}$  (300 MHz,  $\text{CDCl}_3$ , TMS):  $\delta$  7.79–7.11 (m, 15 H, Ar-H), 6.50 (d, 2 H,  $^3J = 6.4$  Hz), 4.23 (dd, 1 H,  $^3J = 4.4$  Hz, 4.4 Hz, CH), 3.43–3.27 (m, 2 H,  $\text{CH}_2$ ), 1.43 (s, 9 H,  $\text{CH}_3$ ). Rt HPLC (Daicel Chiralpak OD-H, 95:5, hexane/dioxane, 254 nm, 0.5 ml/min), 12.0 min (*S*-isomer), 13.2 min (*R*-isomer).

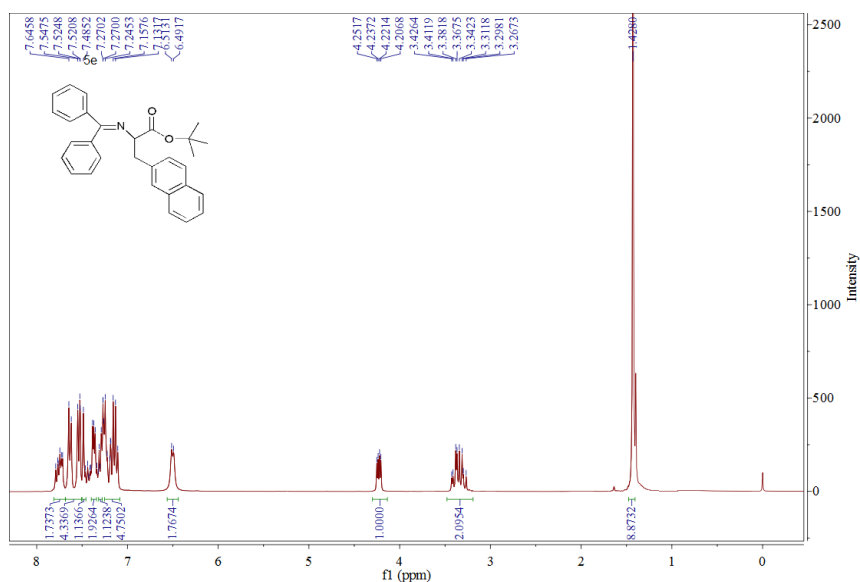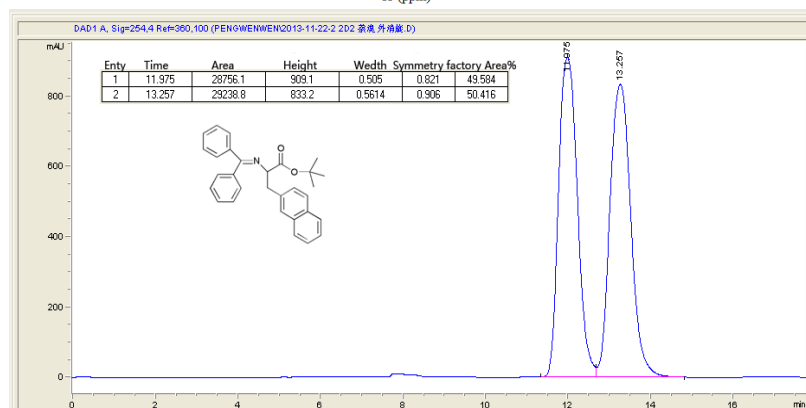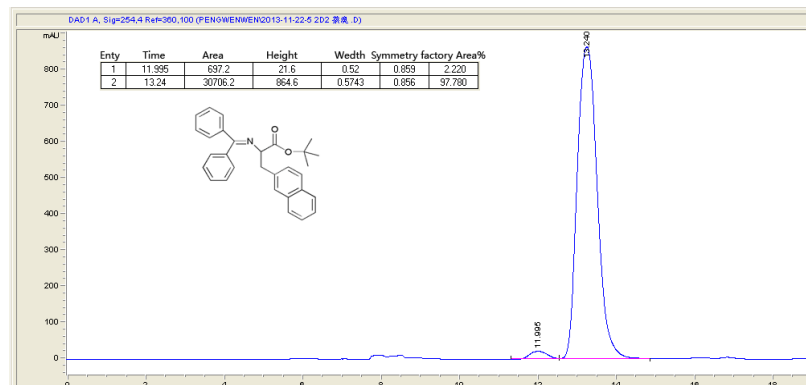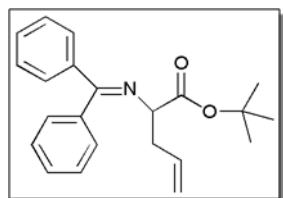

$^1\text{H}$  NMR (300 MHz,  $\text{CDCl}_3$ , TMS):  $\delta$  7.64 (d, 2 H,  $^3J = 6.9$  Hz, Ph-H), 7.47–7.43 (m, 3 H, Ph-H), 7.41–7.35 (m, 3 H, Ph-H), 7.20–7.17 (m, 2 H, Ph-H), 5.80–5.66 (m, 1 H, -CH=), 5.11–5.01 (m, 2 H, =CH<sub>2</sub>), 4.02 (dd, 1 H,  $^3J = 5.6$  Hz, 5.6 Hz, CH), 2.68–2.62 (m, 2 H, CH<sub>2</sub>), 1.45 (s, 9 H, CH<sub>3</sub>). Rt HPLC (Phenomenex Lux 5u Amylose-2, 95:5, hexane/dioxane, 254 nm, 0.5 ml/min), 11.6 min (*R*-isomer), 13.4 min (*S*-isomer).



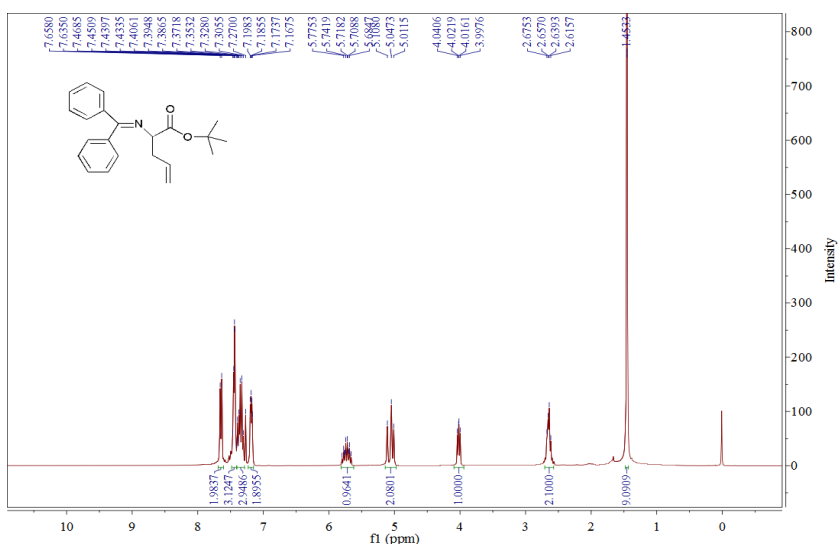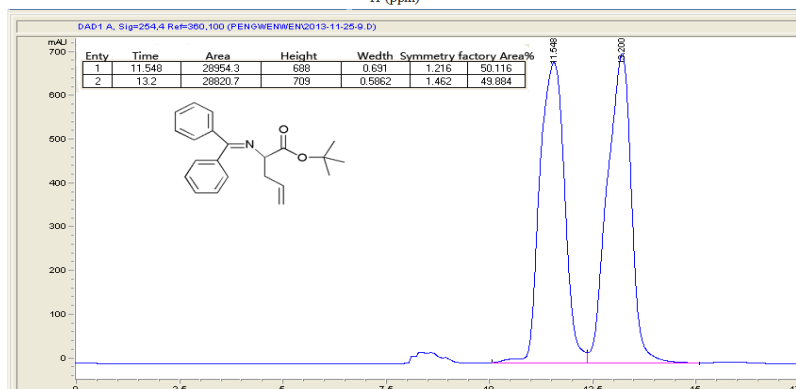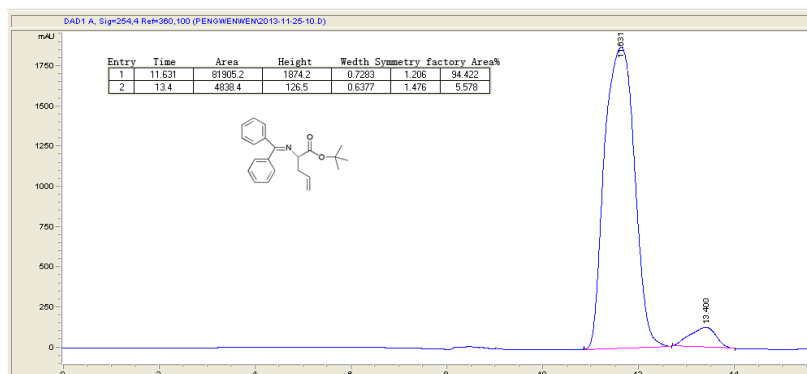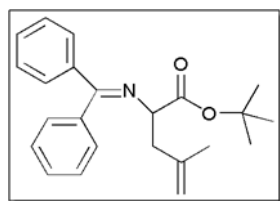

$^1\text{H}$  NMR (300 MHz,  $\text{CDCl}_3$ , TMS):  $\delta$  7.64 (d, 2 H,  $^3J = 6.8$  Hz, Ph-H), 7.47–7.30 (m, 6 H, Ph-H), 7.20–7.17 (m, 2 H, Ph-H), 4.75 (d, 2 H,  $^3J = 6.6$  Hz,  $=\text{CH}_2$ ), 4.09 (dd, 1 H,  $^3J = 5.4$  Hz, 5.3 Hz, CH), 2.68–2.54 (m, 2 H,  $\text{CH}_2$ ), 1.52 (s, 3 H,  $\text{CH}_3$ ), 1.46 (s, 9 H,  $\text{CH}_3$ ). Rt HPLC (Phenomenex Lux 5u Amylose-2, 95:5, hexane/dioxane, 254 nm, 0.5 ml/min), 10.7 min

(*R*-isomer), 12.6 min (*S*-isomer).

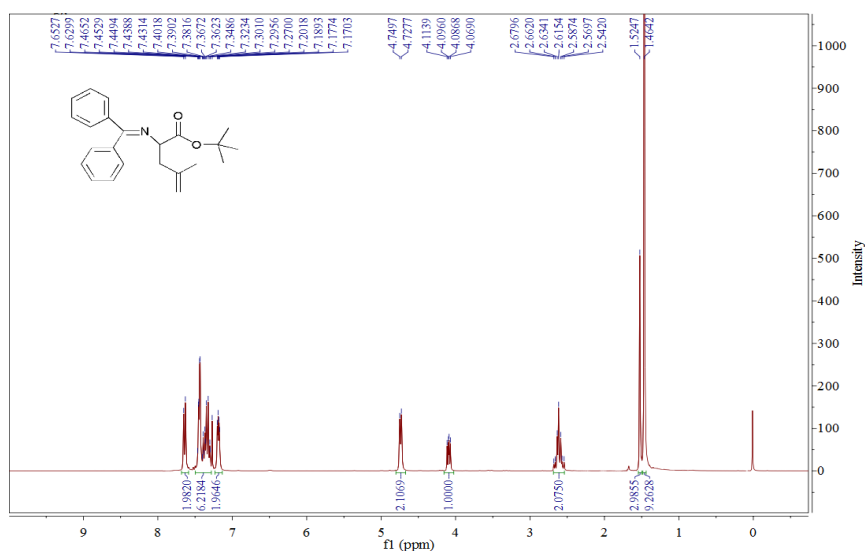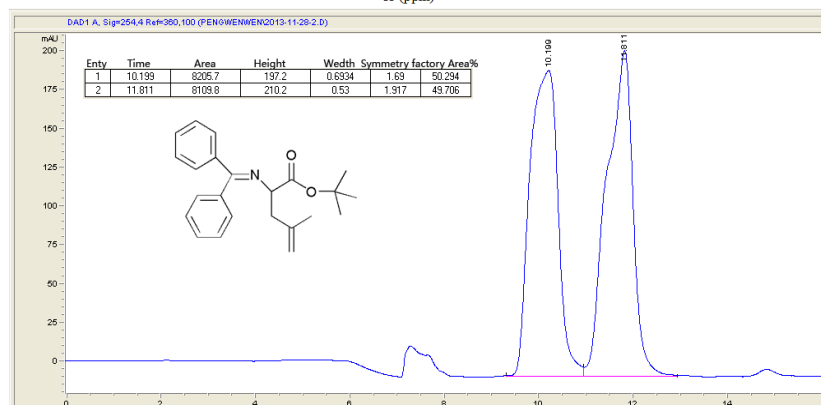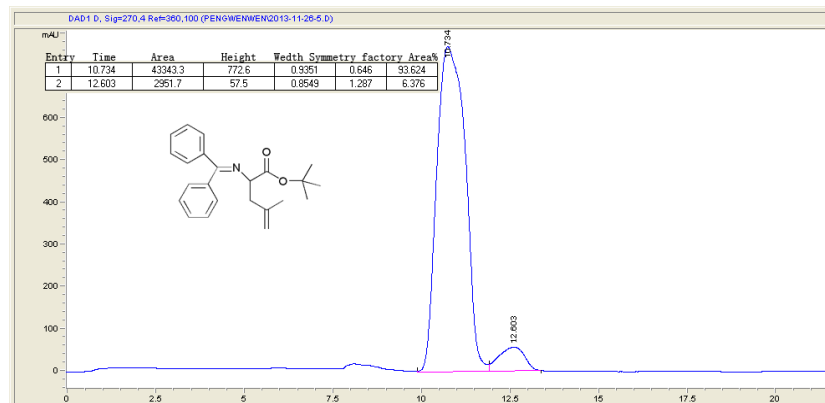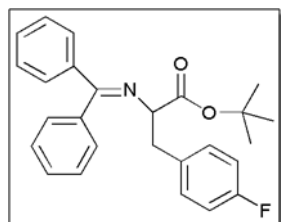

$^1\text{H}$  NMR (300 MHz,  $\text{CDCl}_3$ , TMS):  $\delta$  7.53 (d, 2 H,  $^3J = 6.9$  Hz, Ph-H), 7.35–7.21 (m, 6 H, Ph-H), 7.00–6.80 (m, 4 H, Ph-H), 6.62 (d, 2 H,  $^3J = 6.5$  Hz), 4.04 (dd, 1 H,  $^3J = 4.6$  Hz, 4.7 Hz, CH), 3.19–3.05 (m, 2 H,  $\text{CH}_2$ ), 1.40 (s, 9 H,  $\text{CH}_3$ ).  $^{13}\text{C}$  NMR (75 MHz,  $\text{CDCl}_3$ , TMS):  $\delta$  170.6, 170.4 (C=N, C=O), 163.1, 160.0, 139.3, 134.0, 132.4, 131.2 (d,  $^2J_{\text{C-F}} = 7.8$  Hz, F), 131.1, 130.9, 130.2, 130.0, 128.6, 128.3, 128.2, 128.1, 128.0, 127.5 (Ph), 114.7, (d,  $^1J_{\text{C-F}} =$

20.9 Hz, F), 81.2 (O-C), 67.7 (CH), 38.7 ( $\text{CH}_2$ ), 28.0 ( $\text{CH}_3$ ). Rt HPLC (Phenomenex Lux 5u Amylose-2, 95:5, hexane/dioxane, 254 nm, 0.5 ml/min), 10.3 min (*R*-isomer), 12.5 min (*S*-isomer).

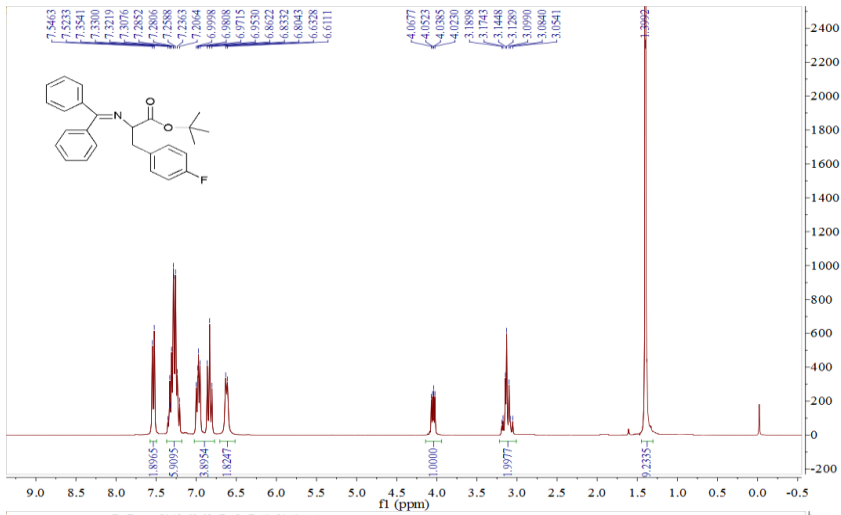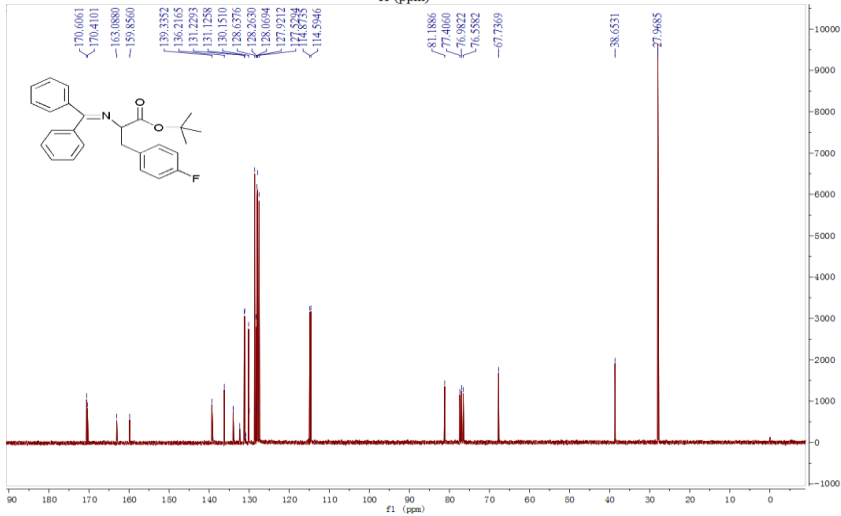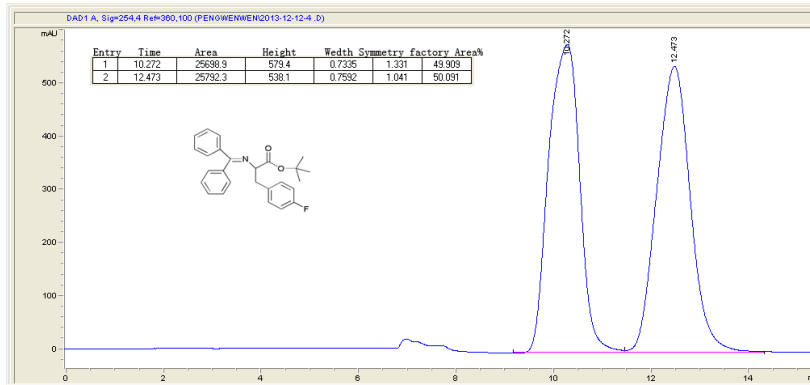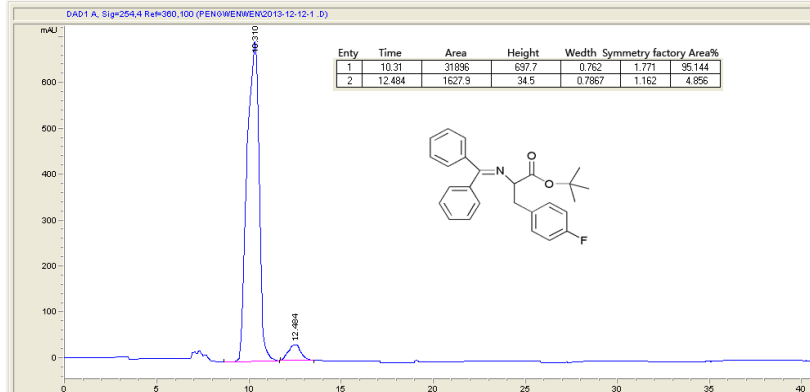

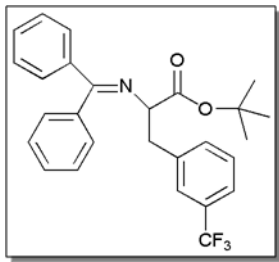

$^1\text{H}$  NMR (300 MHz,  $\text{CDCl}_3$ , TMS):  $\delta$  7.52 (d, 2 H,  $^3J = 7.0$  Hz, Ph-H), 7.40–7.21 (m, 10 H, Ph-H), 6.57 (d, 2 H,  $^3J = 6.6$  Hz, Ph-H), 4.09 (dd, 1 H,  $^3J = 5.6$  Hz, 5.6 Hz, CH), 3.23–3.21 (m, 2 H,  $\text{CH}_2$ ), 1.41 (s, 9 H,  $\text{CH}_3$ ).  $^{13}\text{C}$  NMR (75 MHz,  $\text{CDCl}_3$ , TMS):  $\delta$  170.8, 170.3 (C=N, C=O), 139.3, 139.2, 136.1, 133.4, 133.4, 132.4, 130.5, 130.2, 130.1, 130.0, 128.6, 128.4, 128.3, 128.2, 128.1, 127.9, 127.4, 126.4 (q,  $^2J_{\text{C-F}} = 3.7$  Hz,  $\text{CF}_3$ ), 125.9 (Ph), 123.0 (q,  $^1J_{\text{C-F}} = 3.8$  Hz,  $\text{CF}_3$ ), 81.4 (O-C), 67.3 (CH), 39.2 ( $\text{CH}_2$ ), 27.9 ( $\text{CH}_3$ ). Rt HPLC (Daicel Chiralpak OD-H, 95:5, hexane/dioxane, 254 nm, 0.5 ml/min), 9.4 min (*R*-isomer), 10.9 min (*S*-isomer).

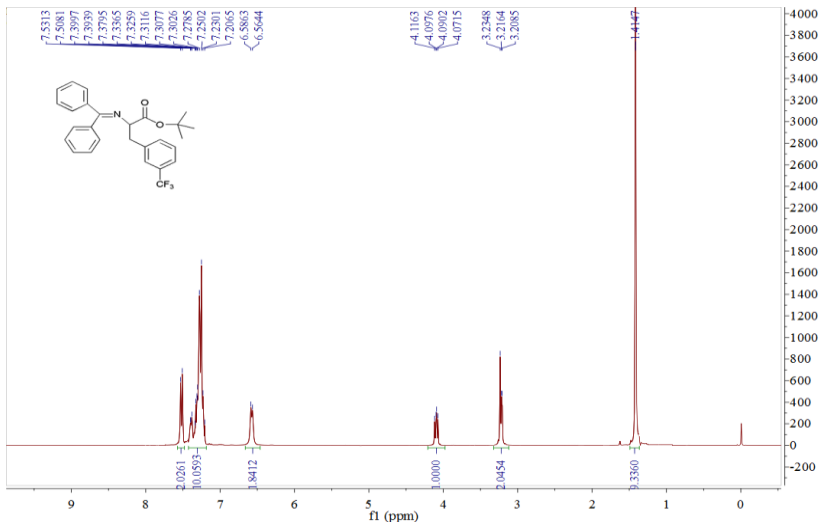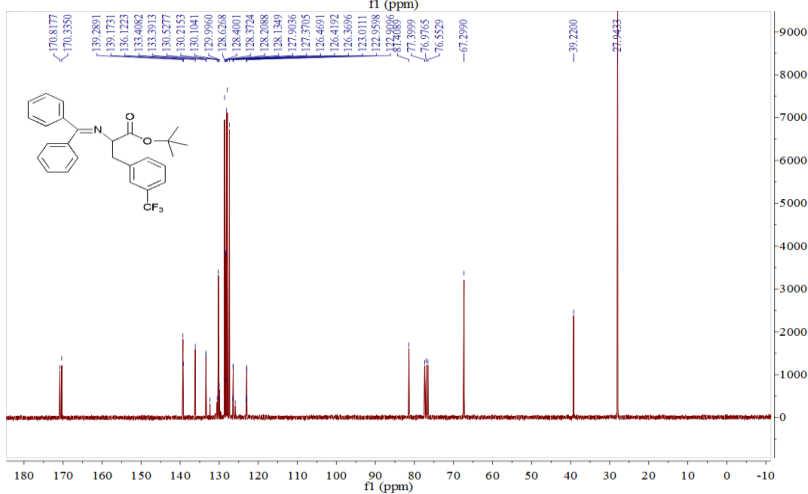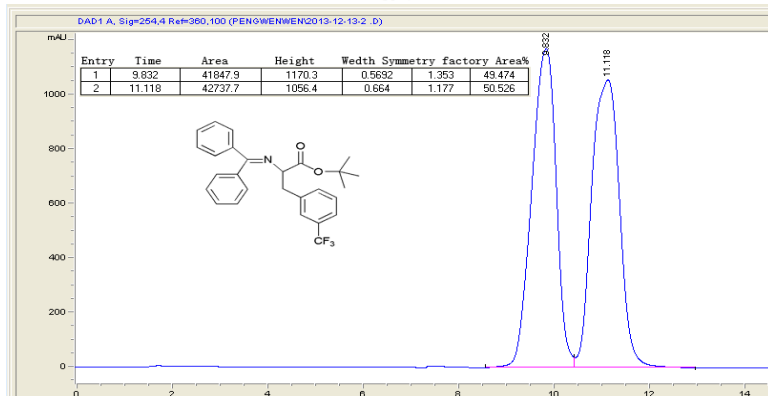

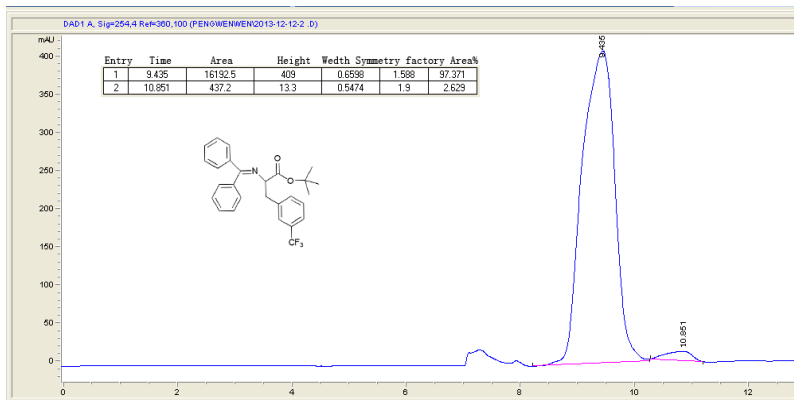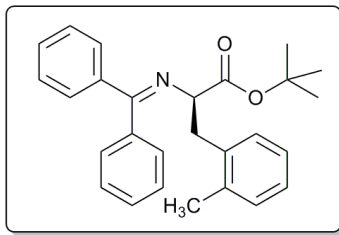

$^1\text{H}$  NMR (300 MHz,  $\text{CDCl}_3$ , TMS):  $\delta$  7.60 (d, 2 H,  $^3J = 7.2$  Hz, Ph-H), 7.35–7.23 (m, 6 H, Ph-H), 7.09–7.04 (m, 4 H, Ph-H), 6.52 (d, 2 H,  $^3J = 4.1$  Hz, Ph-H), 4.15 (dd, 1 H,  $^3J = 3.9$  Hz, 3.9 Hz, CH), 3.33–3.15 (m, 2 H,  $\text{CH}_2$ ), 2.06 (s, 3 H, Ph- $\text{CH}_3$ ), 1.39 (s, 9 H,  $\text{CH}_3$ ).  $^{13}\text{C}$  NMR (75 MHz,  $\text{CDCl}_3$ , TMS):  $\delta$  171.0, 170.1 (C=N, C=O), 139.3, 136.9, 136.3, 136.2, 132.4, 131.0, 130.0, 130.0, 129.9, 128.7, 128.2, 128.1, 127.9, 127.8, 127.6, 126.3, 125.9, 125.5 (C-Ph), 81.0 (O-C), 66.4 (CH), 36.7 ( $\text{CH}_2$ ), 28.0 ( $\text{CH}_3$ ), 19.2 (Ph- $\text{CH}_3$ ). Rt HPLC (Phenomenex Lux 5u Amylose-2, 95:5, hexane/dioxane, 254 nm, 0.5 ml/min), 10.1 min (*R*-isomer), 12.3 min (*S*-isomer).

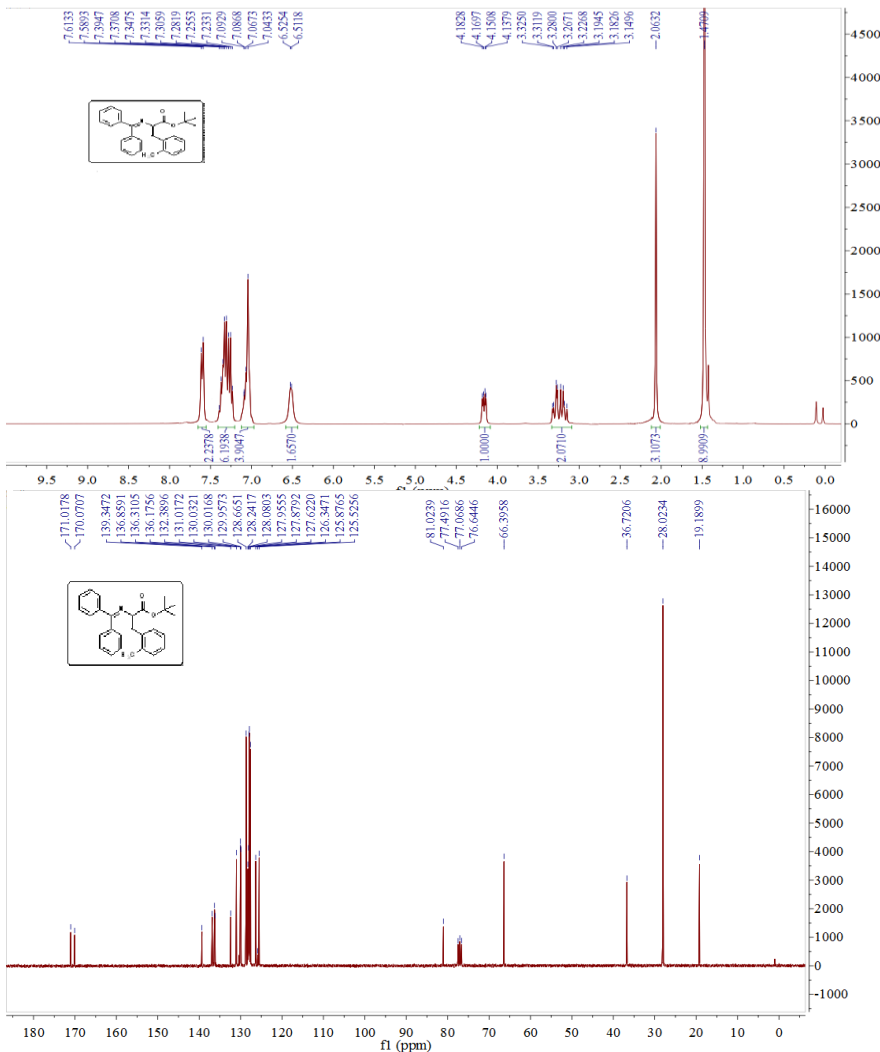

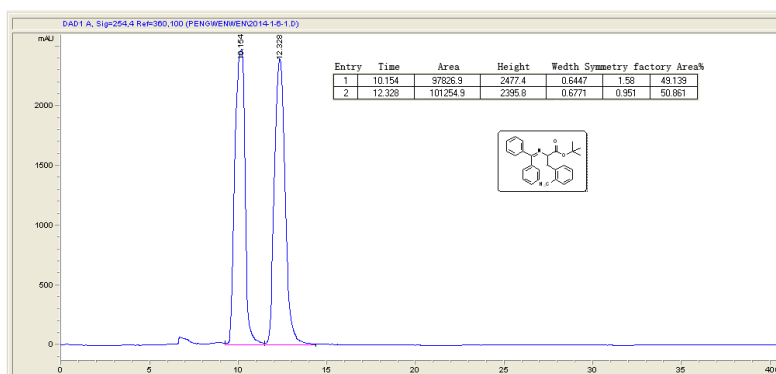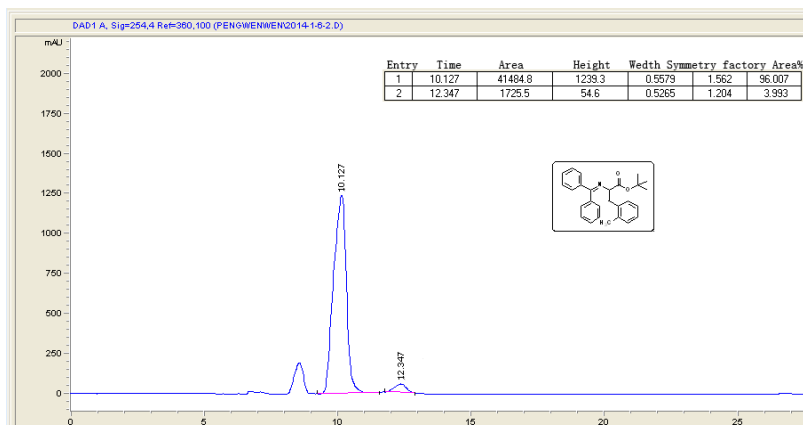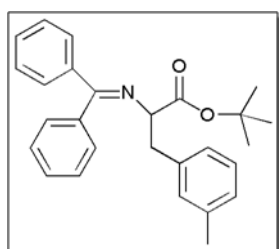

$^1\text{H NMR}$  (300 MHz,  $\text{CDCl}_3$ , TMS):  $\delta$  7.81 (d, 1 H,  $^3J = 7.2$  Hz, Ph-H), 7.62–7.46 (m, 4 H, Ph-H), 7.38–7.26 (m, 7 H, Ph-H), 6.59 (d, 2 H,  $^3J = 6.5$  Hz, Ph-H), 4.09 (dd, 1 H,  $^3J = 4.5$  Hz, 4.3 Hz, CH), 3.23–3.08 (m, 2 H,  $\text{CH}_2$ ), 2.22 (s, 3 H, Ph- $\text{CH}_3$ ), 1.45 (s, 9 H,  $\text{CH}_3$ ).  $^{13}\text{C NMR}$  (75 MHz,  $\text{CDCl}_3$ , TMS):  $\delta$  170.8, 170.2 (C=N, C=O), 139.5, 138.1, 137.4, 136.3, 132.4, 132.3, 130.6, 130.0, 130.0, 128.6, 128.2, 128.2, 128.1, 127.9, 127.8, 127.7, 126.8, 126.7 (C-Ph), 81.0 (O-C), 67.8 (CH), 39.4 ( $\text{CH}_2$ ), 28.0 ( $\text{CH}_3$ ), 21.1 (Ph- $\text{CH}_3$ ). Rt HPLC (Phenomenex Lux 5u

Amylose-2, 95:5, hexane/dioxane, 254 nm, 0.5 ml/min), 10.0 min (*R*-isomer), 12.3 min (*S*-isomer).

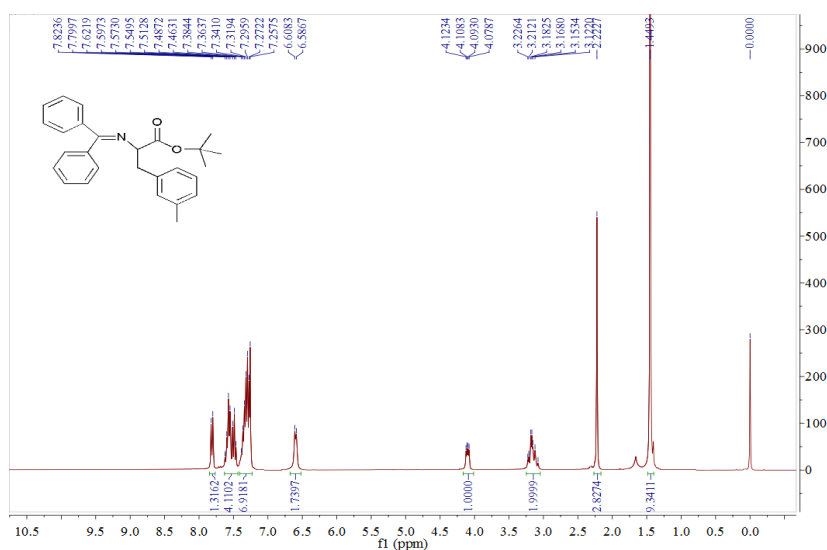

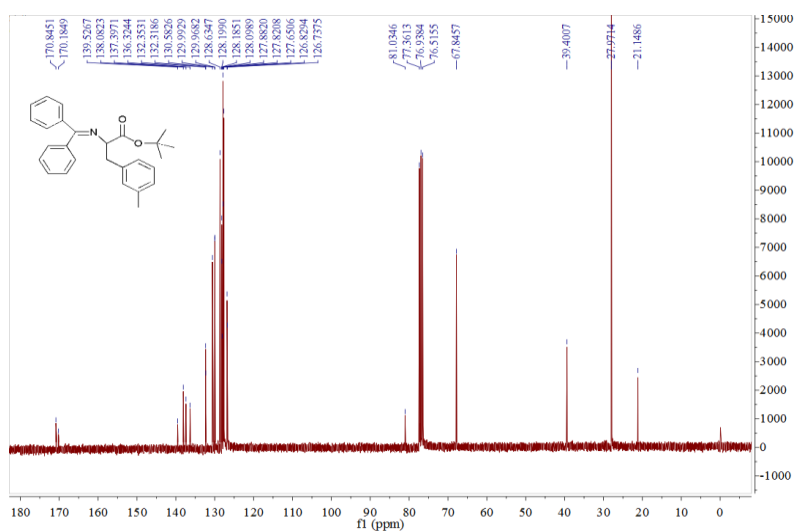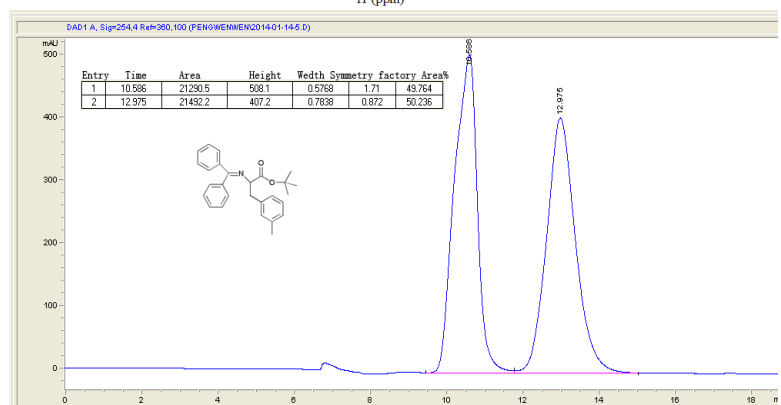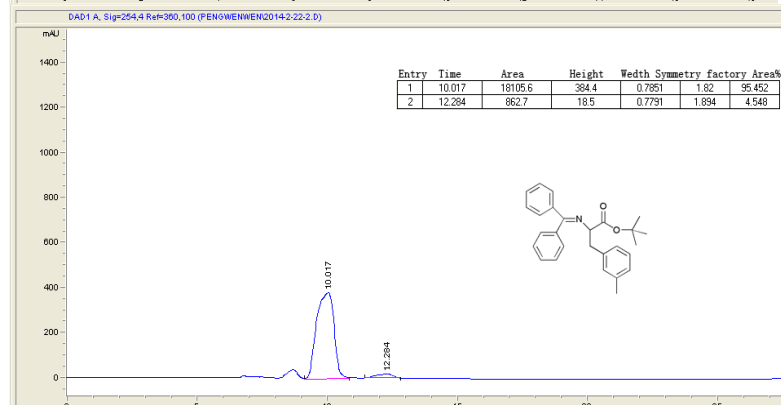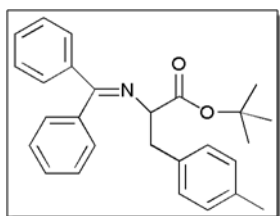

$^1\text{H}$  NMR (300 MHz,  $\text{CDCl}_3$ , TMS):  $\delta$  7.81 (d, 1 H,  $^3J = 7.2$  Hz, Ph-H), 7.58 (d, 2H,  $^3J = 7.1$  Hz, Ph-H), 7.39–7.25 (m, 6 H, Ph-H), 6.96 (q, 4 H,  $^3J = 7.9$  Hz, Ph-H), 6.62 (d, 2 H,  $^3J = 6.6$  Hz, Ph-H), 4.09 (dd, 1 H,  $^3J = 4.4$  Hz, 4.4 Hz, CH), 3.23–3.07 (m, 2 H,  $\text{CH}_2$ ), 2.28 (s, 3 H, Ph- $\text{CH}_3$ ), 1.44 (s, 9 H,  $\text{CH}_3$ ).  $^{13}\text{C}$  NMR (75 MHz,  $\text{CDCl}_3$ , TMS):  $\delta$  170.9, 170.1 (C=N, C=O), 139.5, 137.5, 136.3, 135.5, 135.1, 132.4, 130.0, 129.6, 128.7, 128.2, 128.1, 128.0, 127.9,

127.6 (C-Ph), 81.0 (O-C), 68.0 (CH), 39.1 ( $\text{CH}_2$ ), 28.0 ( $\text{CH}_3$ ), 21.0 (Ph- $\text{CH}_3$ ). Rt HPLC (Phenomenex Lux 5u Amylose-2, 95:5, hexane/dioxane, 254 nm, 0.5 ml/min), 10.7 min (*R*-isomer), 13.1 min (*S*-isomer).

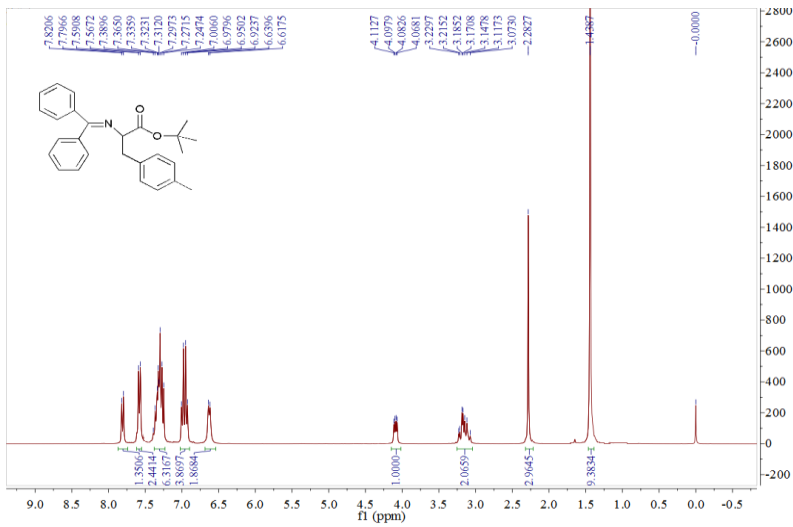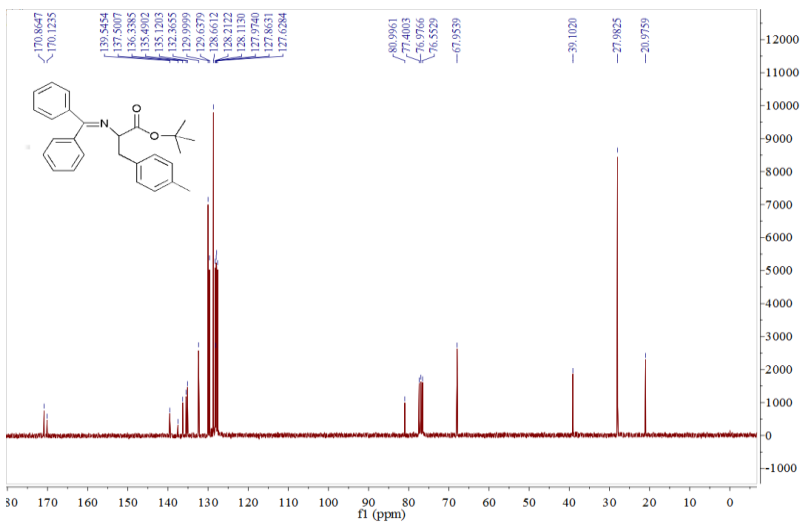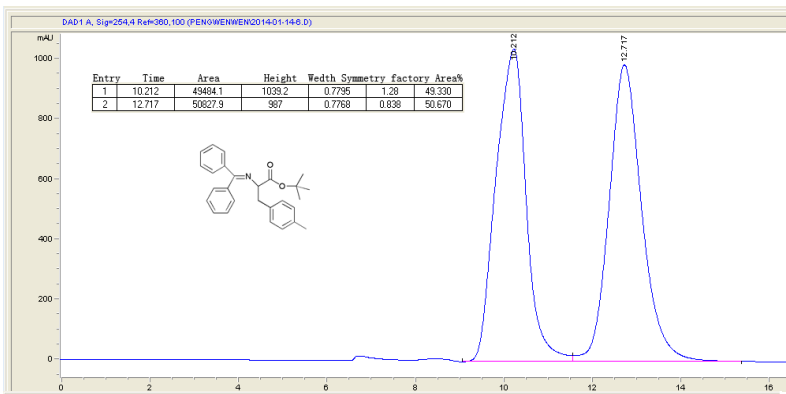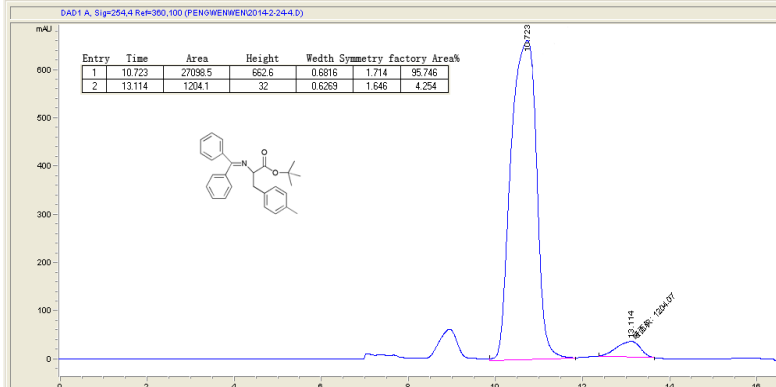



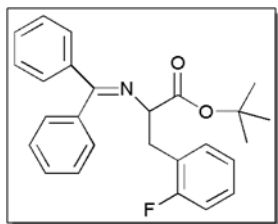

$^1\text{H}$  NMR (300 MHz,  $\text{CDCl}_3$ , TMS):  $\delta$  7.56 (d, 2 H,  $^3J = 7.1$  Hz, Ph-H), 7.37–7.25 (m, 6 H, Ph-H), 7.16–7.11 (m, 2 H, Ph-H), 6.98–6.87 (m, 2 H, Ph-H), 6.66 (d, 2 H,  $^3J = 6.6$  Hz, Ph-H), 4.19 (dd, 1 H,  $^3J = 4.4$  Hz, 4.4 Hz, CH), 3.36–3.12 (m, 2 H,  $\text{CH}_2$ ), 1.44 (s, 9 H,  $\text{CH}_3$ ).  $^{13}\text{C}$  NMR (75 MHz,  $\text{CDCl}_3$ , TMS):  $\delta$  170.6, 170.5 (C=N, C=O), 162.9, 159.7, 139.4, 136.1, 132.3, 130.1, 130.0, 128.7, 128.2, 128.2, 128.0, 128.0, 127.9, 127.9, 127.6 (C-Ph), 125.2 (d,  $^3J_{\text{C-F}} = 15.5$  Hz, F), 123.5 (d,  $^2J_{\text{C-F}} = 3.5$  Hz, F), 114.9 (d,  $^1J_{\text{C-F}} = 21.9$  Hz, F), 81.2 (O-C), 66.0 (CH), 32.6 ( $\text{CH}_2$ ), 27.9 ( $\text{CH}_3$ ). Rt HPLC (Phenomenex Lux 5u Amylose-2, 95:5, hexane/dioxane, 254 nm, 0.5 ml/min), 11.0 min (*R*-isomer), 13.7 min (*S*-isomer).

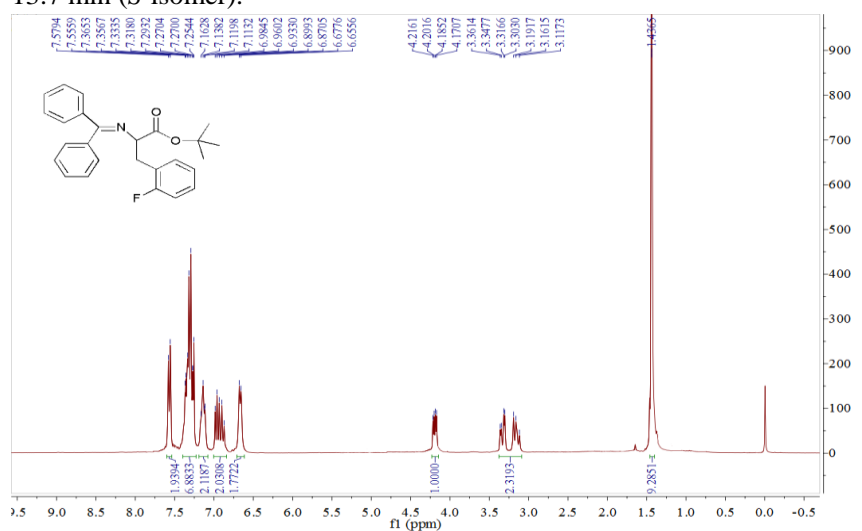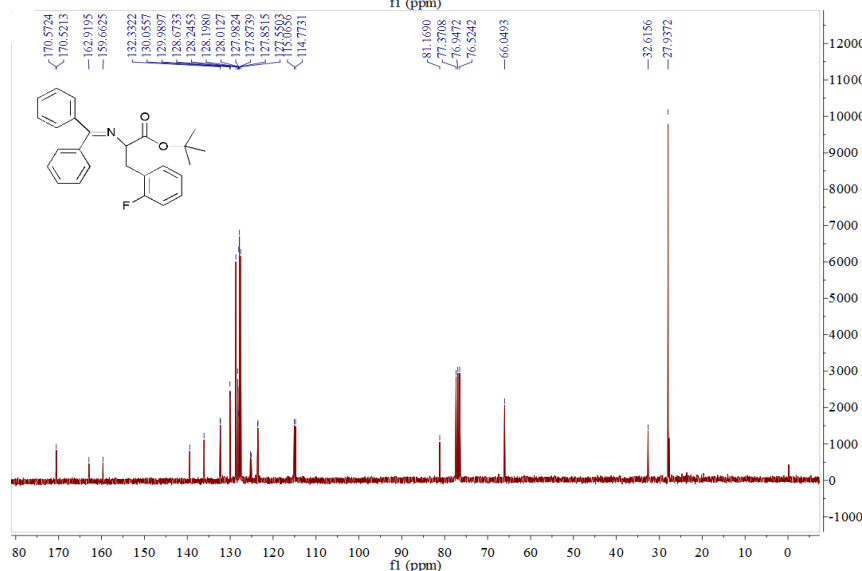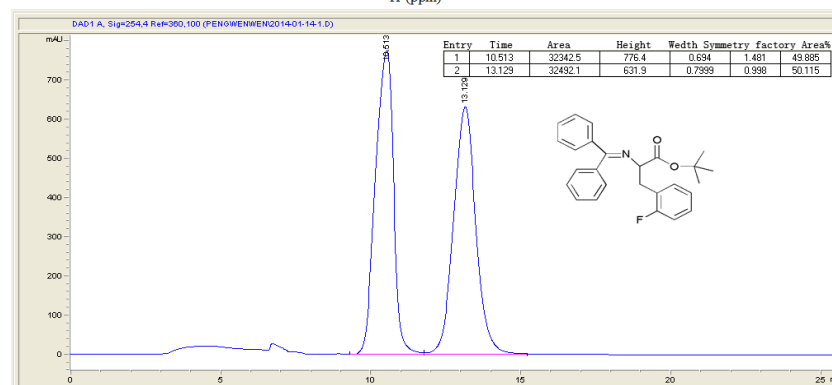

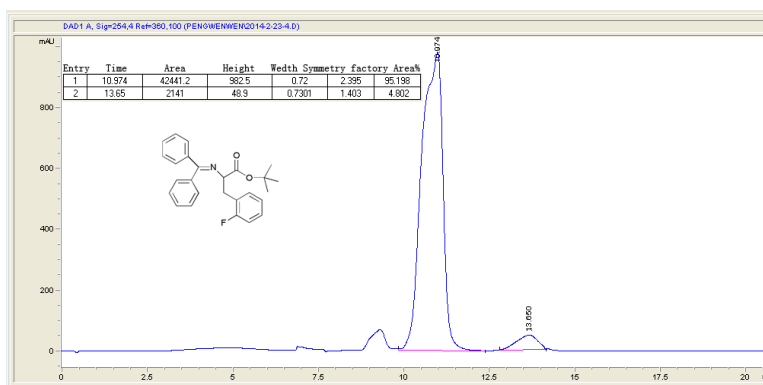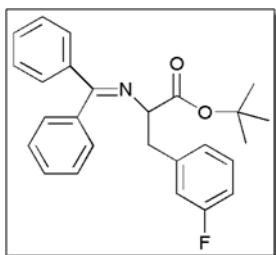

$^1\text{H}$  NMR (300 MHz,  $\text{CDCl}_3$ , TMS):  $\delta$  7.49 (d, 2 H,  $^3J = 6.7$  Hz, Ph-H), 7.26–7.19 (m, 7 H, Ph-H), 7.08 (q, 1 H,  $^3J = 6.6$  Hz, Ph-H), 6.79–6.62 (m, 4 H, Ph-H), 6.66 (d, 2 H,  $^3J = 6.6$  Hz, Ph-H), 4.04 (dd, 1 H,  $^3J = 3.8$  Hz, 3.8 Hz, CH), 3.17–3.04 (m, 2 H,  $\text{CH}_2$ ), 1.37 (s, 9 H,  $\text{CH}_3$ ).

$^{13}\text{C}$  NMR (75 MHz,  $\text{CDCl}_3$ , TMS):  $\delta$  170.5, 170.4 (C=N, C=O), 164.2, 160.9, 140.8 (d,  $^3J_{\text{C-F}} = 7.4$  Hz, F), 139.3, 136.2, 132.3, 130.1, 130.0, 128.6, 128.3, 128.2, 128.1, 127.9, 127.5, 125.5, 125.4 (C-Ph), 116.4 (d,  $^2J_{\text{C-F}} = 20.9$  Hz, F), 112.9 (d,  $^1J_{\text{C-F}} = 20.9$  Hz, F), 81.2 (O-C),

67.4 (CH), 39.2 ( $\text{CH}_2$ ), 27.9 ( $\text{CH}_3$ ). Rt HPLC (Phenomenex Lux 5u Amylose-2, 95:5, hexane/dioxane, 254 nm, 0.5 ml/min), 9.8 min (*R*-isomer), 12.1 min (*S*-isomer).

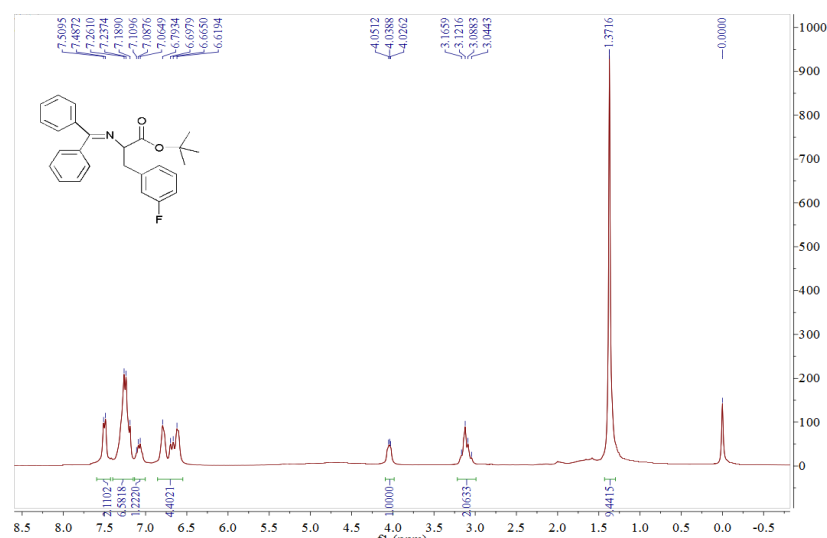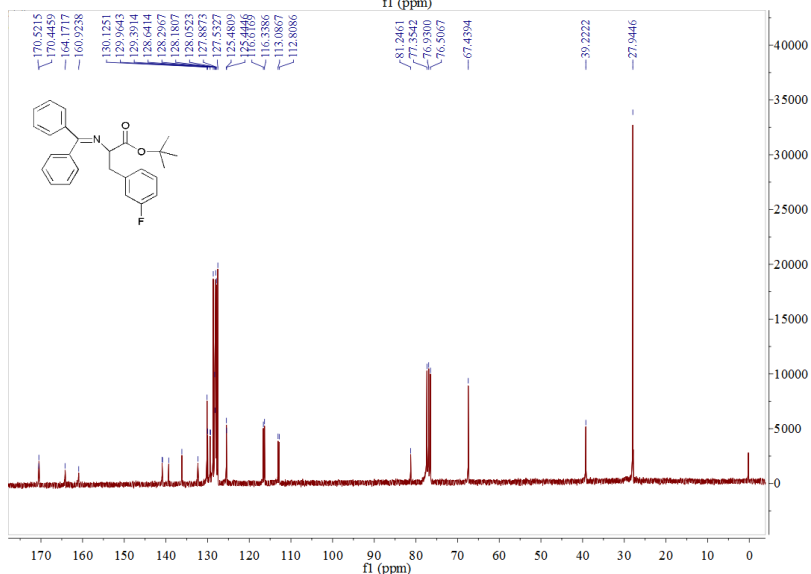

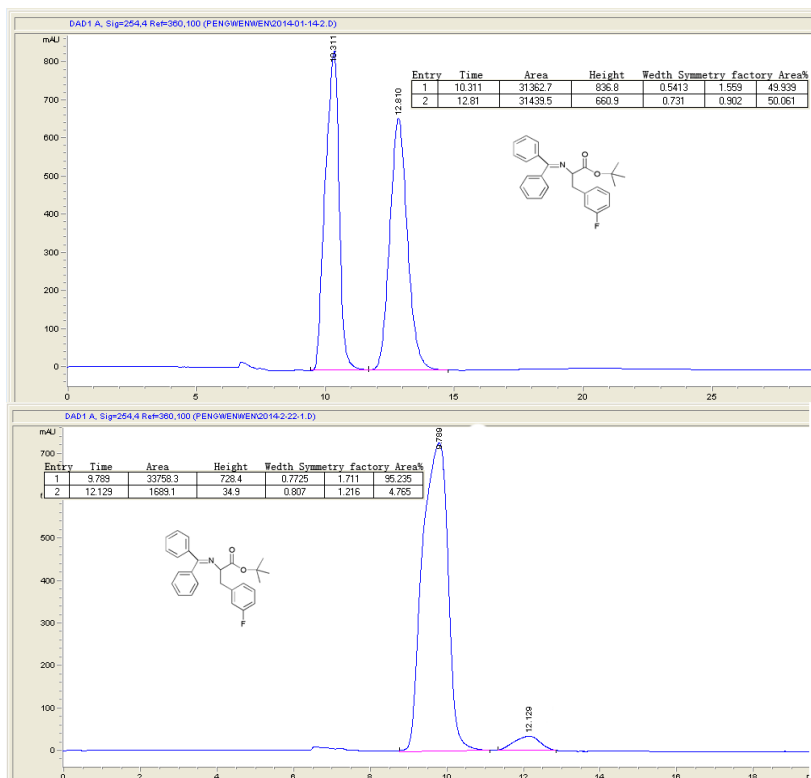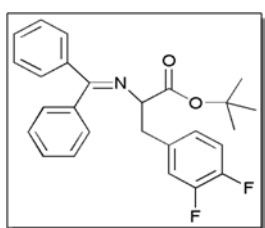

$^1\text{H NMR}$  (300 MHz,  $\text{CDCl}_3$ , TMS):  $\delta$  7.57 (d, 2 H,  $^3J = 7.0$  Hz, Ph-H), 7.40–7.25 (m, 6 H, Ph-H), 7.02–6.73 (m, 5 H, Ph-H), 4.10 (dd, 1 H,  $^3J = 4.7$  Hz, 4.7 Hz, CH), 3.21–3.07 (m, 2 H,  $\text{CH}_2$ ), 1.44 (s, 9 H,  $\text{CH}_3$ ).  $^{13}\text{C NMR}$  (75 MHz,  $\text{CDCl}_3$ , TMS):  $\delta$  170.7, 170.3 (C=N, C=O), 148.1 (d,  $^3J_{\text{C-F}} = 12.5$  Hz, F), 147.3 (d,  $^3J_{\text{C-F}} = 12.5$  Hz, F), 139.2, 136.1, 135.3 (dd,  $^1J_{\text{C-F}} = 5.7$  Hz, F,  $^2J_{\text{C-F}} = 3.9$  Hz, F), 132.3, 130.3, 130.0, 128.6, 128.4, 128.2, 128.1, 127.9, 127.5, 125.6 (dd,  $^1J_{\text{C-F}} = 6.0$  Hz, F,  $^2J_{\text{C-F}} = 3.6$  Hz, F), 118.4 (d,  $^2J_{\text{C-F}} = 16.8$  Hz, F), 116.6 (d,  $^2J_{\text{C-F}} = 16.8$  Hz, F), 114.4 (C-Ph), 81.4 (O-C), 67.3 (CH), 38.7 ( $\text{CH}_2$ ), 27.9 ( $\text{CH}_3$ ). Rt HPLC (Phenomenex Lux 5u Amylose-2, 95:5, hexane/dioxane, 254 nm, 0.5 ml/min), 10.3 min (*R*-isomer), 12.3 min (*S*-isomer).

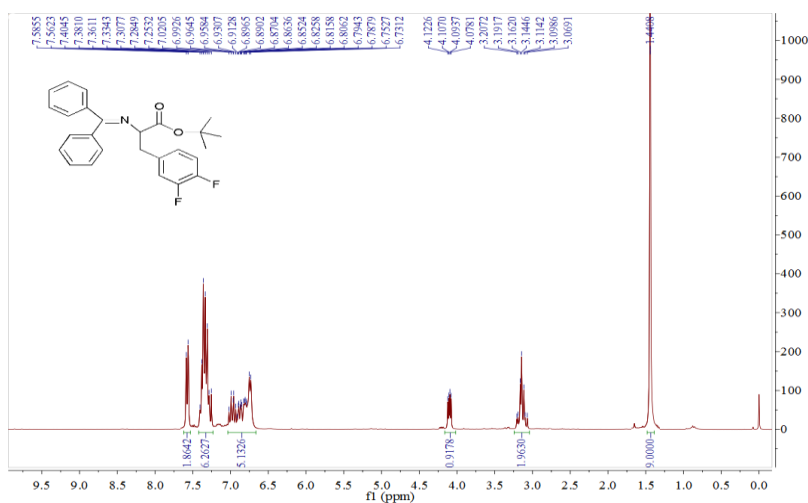

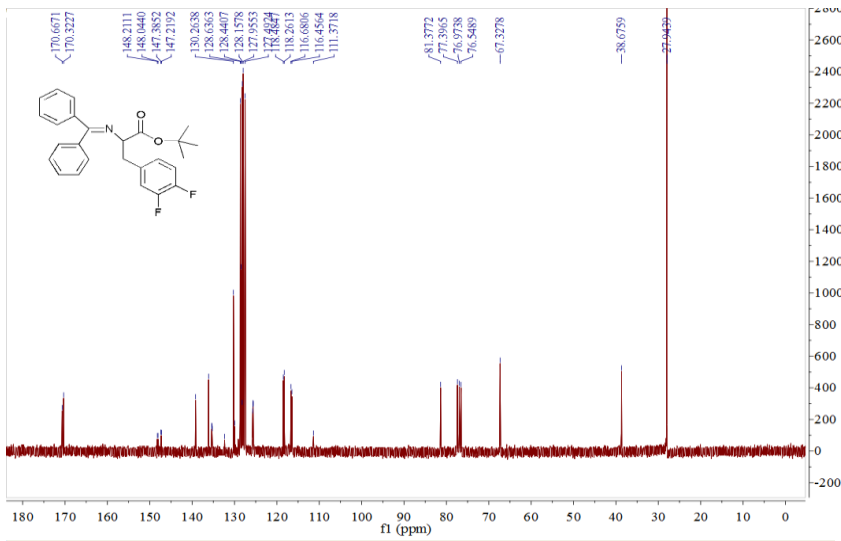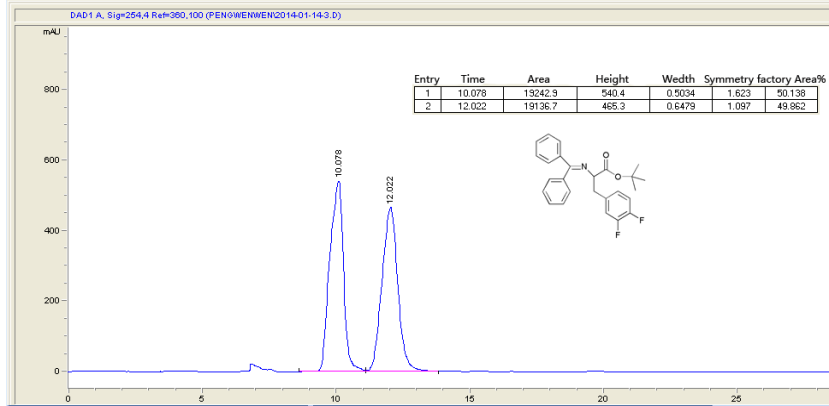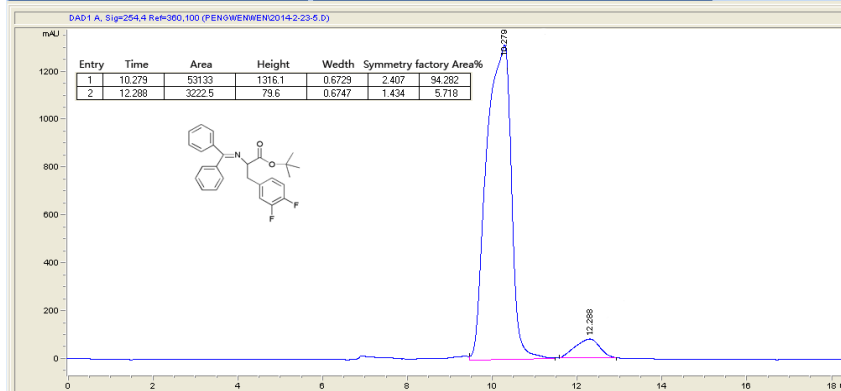

Supplement: c4ob01648c1.pdf [file c4ob01648c1.pdf]
